1     **Rapid selection response to ethanol in *S. eubayanus* emulates the domestication**  
2                                   **process under brewing conditions**

3     Wladimir Mardones<sup>1,2</sup>, Carlos A. Villarroel<sup>1,2</sup>, Valentina Abarca<sup>1,2</sup>, Kamila  
4     Urbina<sup>1,2</sup>, Tomás A. Peña<sup>1,2</sup>, Jennifer Molinet<sup>1,2</sup>, Roberto F. Nespolo<sup>2,3,4</sup> and  
5     Francisco A. Cubillos<sup>1,2\*</sup>

6     <sup>1</sup>Universidad de Santiago de Chile, Facultad de Química y Biología, Departamento de  
7     Biología, Santiago, Chile.

8     <sup>2</sup>ANID – Millennium Science Initiative Program - Millennium Institute for Integrative  
9     Biology (iBio)

10    <sup>3</sup>Instituto de Ciencias Ambientales y Evolutivas, Universidad Austral de Chile, Valdivia,  
11    5090000, Chile.

12    <sup>4</sup>Center of Applied Ecology and Sustainability (CAPES), Santiago, Chile.

13    \*Corresponding author: Francisco A. Cubillos, Universidad de Santiago de Chile,  
14    Facultad de Química y Biología, Departamento de Biología, Santiago, 9170022, Chile Mail:  
15    [francisco.cubillos.r@usach.cl](mailto:francisco.cubillos.r@usach.cl)

16    Running title: *S. eubayanus* domestication for brewing

17

18    Keywords: Yeast, Fermentation, Beer, domestication, experimental, evolution,  
19    *S. eubayanus*

20

21 **ABSTRACT**

22 Although the typical genomic and phenotypic changes that characterize the evolution of  
23 organisms under the human domestication syndrome represent textbook examples of rapid  
24 evolution, the molecular processes that underpin such changes are still poorly understood.  
25 Domesticated yeasts for brewing, where short generation times and large phenotypic and  
26 genomic plasticity were attained in a few generations under selection, are prime examples.  
27 To experimentally emulate the lager yeast domestication process, we created a genetically  
28 complex (panmictic) artificial population of multiple *Saccharomyces eubayanus* genotypes,  
29 one of the parents of lager yeast. Then we imposed a constant selection regime under a  
30 high ethanol concentration in 10 replicated populations during 260 generations (six months)  
31 and compared them with evolved controls exposed solely to glucose. Evolved populations  
32 exhibited a selection differential of 60% in growth rate in ethanol, mostly explained by the  
33 proliferation of a single lineage (CL248.1) that competitively displaced all other clones.  
34 Interestingly, the outcome does not require the entire time course of adaptation, as four  
35 lineages monopolized the culture at generation 120. Sequencing demonstrated that *de novo*  
36 genetic variants were produced in all evolved lines, including SNPs, aneuploidies, INDELS,  
37 and translocations. In addition, the evolved populations showed correlated responses  
38 resembling the domestication syndrome: genomic rearrangements, faster fermentation  
39 rates, lower production of phenolic-off flavors and lower volatile compound complexity.  
40 Expression profiling in beer wort revealed altered expression levels of genes related to  
41 methionine metabolism, flocculation, stress tolerance and diauxic shift, likely contributing to  
42 higher ethanol and fermentation stress tolerance in the evolved populations. Our study  
43 shows that experimental evolution can rebuild the brewing domestication process in “fast  
44 motion” in wild yeast, and also provides a powerful tool for studying the genetics of the  
45 adaptation process in complex populations.

## 46 INTRODUCTION

47 Living organisms are continually adapting to changing environments by natural selection,  
48 latently harboring the raw genetic variation required for such responses. When new  
49 conditions arise, adaptation to almost every environmental scenario is possible (e.g.,  
50 temperature, oxygen and nutrients) [1, 2]. In this context, the genomic analysis of human-  
51 made populations (i.e., population genomics of domesticated species) is a relatively new  
52 matter, and constitutes a promising research approach for the experimental study of  
53 evolutionary processes [3]. Nevertheless, studies that search for the causal factors shaping  
54 the genetic structure of yeast and fungal populations, such as small nucleotide  
55 polymorphisms (SNP), insertions or deletions (INDELS), copy number variation (CNV) and  
56 structural variants (SV), are still insufficient to fully characterize the integrated adaptation  
57 process to new environments [4].

58 Adaptive evolution in microorganisms is a process that occurs ubiquitously, including in  
59 artificial settings where micro-environments are created, and allows the adaptation of  
60 populations to defined conditions, driving the evolution process (domestication) [5].  
61 Domestication is a stereotyped adaptive process (a “domestication syndrome”, see [6, 7])  
62 within a human-created environment, where several characteristics can be tracked and  
63 defined as ‘domestication signatures’. These signatures are present in different fungal  
64 species, including *Aspergillus oryzae* in soy sauce [8], *Penicillium* molds associated with  
65 cheese [9] and *S. cerevisiae* [10, 11] together with *S. pastorianus* [12], responsible for beer  
66 fermentation. In this context, spore production and viability, metabolic remodeling, changes  
67 in volatile compound production, transcriptional re-wiring and faster growth rates are  
68 considered key traits and goals of microbe domestication. In the case of brewing, the yeast  
69 re-utilization process led to new spontaneous mutations generated during cell division,  
70 which, together with selective environmental pressures, such as high ethanol  
71 concentrations, selected fitter individuals [13]. Genomic analysis in beer yeast domesticated

72 strains demonstrated the presence of common genetic patterns, such as large genomic  
73 rearrangements, aneuploidies, high heterozygosity levels and infertility, all of which are  
74 hallmarks of the adaptation process [11, 14-16].

75 Two main types of yeasts suffered domestication under different brewing settings; *S.*  
76 *cerevisiae* that ferments ale beers at temperatures near 20 °C, and *S. pastorianus* that  
77 produce lager beers fermented at lower temperatures (8-15 °C) [17]. *S. pastorianus* is an  
78 interspecific hybrid from the cross between *S. cerevisiae* and the cryotolerant wild yeast *S.*  
79 *eubayanus* [18]. The hybrid nature of *S. pastorianus* confers a series of competitive  
80 advantages in the fermentation environment, likely due to the combination of performance  
81 at relatively cold temperatures, efficient sugar uptake and metabolic switching between  
82 sugar sources [19]. During an intense domestication process over approximately 500 years,  
83 lager beers have evolved reduced organoleptic complexity, mainly characterized by the  
84 presence of ester compounds and the absence of phenolic off-flavors [20]. This is reflected  
85 in the absence of *PAD1* and *FDC1* in *S. pastorianus*, genes which are responsible for the  
86 synthesis of such off-flavors [21, 22] and present in *S. eubayanus*. Lager yeast  
87 domestication is characterized by a reduced lag phase in the switch from glucose to maltose,  
88 and regulatory cross-talk between *S. cerevisiae* and *S. eubayanus* sub-genomes, which  
89 complement each other in terms of the genes required for maltose/maltotriose metabolism  
90 [23, 24].

91 Given the recent discovery of *S. eubayanus*, its puzzling origin and apparently co-  
92 evolutionary association with *Nothofagus* trees, several authors have analyzed the  
93 worldwide distribution of *S. eubayanus*, together with its genetic, phenotypic, and  
94 fermentative diversity [24-27]. Patagonian isolates of *S. eubayanus* exhibit the most  
95 extensive genetic diversity, and the presence of the most significant number of lineages  
96 compared to Northern hemisphere populations, including five different lineages and a large

97 group of admixed isolates [26, 27]. To date, there is no evidence of *S. eubayanus* isolates  
98 in Europe, where the original *S. pastorianus* hybrid likely originated. Interestingly,  
99 fermentation capacity varies significantly between *S. eubayanus* isolates, possibly due to  
100 differences in maltose consumption and diauxic shift capacity, resulting in two opposite  
101 outcomes: successful or stuck fermentations [27]. These isolates produce fruit and floral  
102 flavors in beer [28], but high levels of 4-vinyl guaiacol, considered a phenolic off-flavor that  
103 provides a clove-like aroma, which is not preferred among consumers [21, 28, 29] [30].

104 Although different reports have provided insights into the genomic and phenotypic changes  
105 responsible for the brewing capacity of *S. pastorianus*, particularly the *S. cerevisiae* genome  
106 portion, we know little about the process of *S. eubayanus* domestication before or after  
107 hybridization. Thus, further evidence is needed to understand the molecular mechanisms  
108 underpinning the *S. eubayanus* fermentative phenotype, which in turn will provide important  
109 insights into the inherent evolutionary process represented by directional selection for  
110 domestication, and correlated responses. In this study, a genetically complex artificial  
111 mixture of 30 different genotypes of *S. eubayanus* was continually exposed to high ethanol  
112 levels, mimicking the domestication process in breweries. We measured their correlated  
113 responses including their genomic, transcriptomic and phenotypic changes, and identified  
114 candidate genes that confer ethanol tolerance. Our results demonstrate that a single genetic  
115 background consistently overcomes the remaining strains, showing greater fermentation  
116 performance, but also significantly higher fitness in oxidative and osmotic stress  
117 environments. To an extent, we thus recreate the domestication process in the laboratory,  
118 showing how this cryotolerant yeast adapted to the competitive beer environment of a  
119 human industry and proved that experimental evolution can rebuild the brewing  
120 domestication process in *S. eubayanus* in “fast motion”. This provides a powerful tool for

121 disentangling the molecular, physiological and biochemical processes that underlie the  
122 domestication of domesticated microorganisms.

123

## 124 **MATERIALS AND METHODS**

### 125 **Microorganisms and culture media**

126 Thirty *S. eubayanus* strains isolated from bark samples obtained from *Nothofagus pumilio*  
127 trees in south Chile were utilized for the experimental evolution assay, as listed in **Table S1**.  
128 These strains were previously reported and belong to the Patagonia B cluster [27]. *S.*  
129 *cerevisiae* L299 [31] and MTF2444 (EC1118 *hsp12::GFP*) [32] strains were used as growth  
130 control and in the competition assays, respectively. Additionally, we used the *S. pastorianus*  
131 Saflager W-34/70 (Fermentis, France) strain as a lager fermentation control. All isolates  
132 were maintained in YPD agar media (yeast extract 1%, peptone 2%, glucose 2% and agar  
133 2%) and stored at -80°C in 20% glycerol stocks.

### 134 **Experimental evolution**

135 Initially, one colony from each *S. eubayanus* strain was cultured in 0.67% yeast nitrogen  
136 base (YNB) media (Difco, France) with 2% glucose at 20°C (hereinafter referred to as GLU)  
137 and 150 rpm orbital shaking. Later, each pre-inoculum was utilized to prepare a co-culture  
138 in a single 250 mL flask to obtain a final concentration of  $1 \times 10^6$  cells/mL of each strain. Ten  
139 replicates were set up (parallel populations) in 5 mL GLU and ten supplemented with 0.67%  
140 YNB media, 2% glucose and 9% ethanol (hereinafter referred to as EtOH). The inoculum  
141 was resuspended and transferred to the 20 replicates to obtain a final concentration of  $1 \times 10^6$   
142 cells/mL (**Figure 1A**). The adaptative evolution assays were performed at 20°C at 150 rpm  
143 for 72 h. Subsequently, the cultures were used to inoculate fresh 5 mL cultures at an  
144 inoculum density of  $1 \times 10^6$  cell/mL, and this procedure was sequentially repeated. The

145 number of generations was estimated using the "generations = log (final cells - log initial  
146 cells)/log2" formula, summing up the number of cells/mL doublings between every culture  
147 transfer during the adaptive evolution process.

## 148 **Phenotyping assay**

149 The phenotyping assay was performed as previously described [27]. Briefly, isolates were  
150 pre-cultivated in 200  $\mu$ L 0.67% YNB medium supplemented with glucose 2% for 48 h at  
151 25°C. Next, strains were inoculated to an optical density (OD) of 0.03–0.1 (wavelength 630  
152 nm) in 200  $\mu$ L growth media, where the following carbon sources were considered: Glucose  
153 2%, Fructose 2%, Maltose 2%, Galactose 2%, Pilsner Beer Wort 12 °Plato (°P) and  
154 incubated without agitation at 20°C for 24 h using a Tecan Sunrise absorbance microplate  
155 reader. Additionally, several environmental stressors were assessed, including ethanol 9%,  
156 Sorbitol 20%, H<sub>2</sub>O<sub>2</sub> 3 mM, SDS 0.001% and high temperature (28 and 34°C) during 48 h.  
157 For ethanol 9%, experiments were carried out for 96 h. The OD was measured every 30  
158 minutes using a 630 nm filter. Each experiment was performed in triplicate. Maximum growth  
159 rate, lag time and OD max parameters were obtained for each strain using the GrowthRates  
160 software with default parameters [33].

161 Growth curves incorporating carbon source switching from glucose to maltose and galactose  
162 were determined under micro-cultivation conditions in YP (1% yeast extract, 2% peptone)  
163 media including either 5% glucose, 5% maltose or 5% galactose at 25°C for 48 h. Pre-  
164 cultures were grown in YP with 5% glucose medium at 25°C for 24 h. Cultures were then  
165 diluted to an initial OD<sub>600nm</sub> of 0.1 in fresh YP 5% glucose medium for an extra overnight  
166 growth. The next day, cultures were used to inoculate a 96-well plate with a final volume of  
167 200  $\mu$ L YP with the disaccharide source at an initial OD<sub>600nm</sub> of 0.1. The growth curves  
168 were monitored by measuring the OD<sub>600nm</sub> every 30 min as previously mentioned. All

169 experiments were performed in triplicate. Lag phase and maximum specific growth rate  
170 ( $\mu_{max}$ ) were estimated as previously described [34] using the R software version 3.6.3.

### 171 **Fermentations in beer wort**

172 Fermentations were carried out as previously described [28, 29]. Briefly, fermentations were  
173 performed in at least three biological replicates, depending on the experiment, in 12 °P using  
174 a BrewFerm Pilsner commercial beer kit (Beringen, Belgium). For this, a colony was  
175 transferred to 5 mL 6 °P pilsner beer wort supplemented with 0.3 ppm  $ZnCl_2$  and incubated  
176 at 20°C with orbital shaking at 150 rpm for 24 h. Then, the complete pre-inoculum was  
177 transferred to 50 mL 12 °P pilsner beer wort and incubated in similar conditions for 24 h.  
178 Cells were utilized to inoculate 50 mL fresh 12 °P pilsner beer wort to a final concentration  
179 of  $1.8 \times 10^7$  cell/mL. Cultures were maintained at 12°C for 14 days without agitation and  
180 weighed every day to calculate the  $CO_2$  released.

181 Larger volume fermentations for RNA extraction and metabolite production analysis were  
182 carried out in 1.5 L 12 °P beer wort for 14 days at 12°C. At the end of the fermentation,  
183 metabolites such as glucose, fructose, maltose, maltotriose, ethanol and glycerol were  
184 estimated using HPLC [27]. Volatile compounds were detected using HS-SPME-GC-MS as  
185 previously described [28].

### 186 **Competition Assays**

187 A total of  $1 \times 10^6$  cells/mL of the evolved and *S. cerevisiae* MTF2444 (EC1118 *hsp12::GFP*)  
188 strains were separately pre-incubated in 5 mL YNB media supplemented with 2% glucose  
189 for 24 h. Evolved individuals were mixed in equal proportions with the *S. cerevisiae*  
190 MTF2444 GFP expressing-mutant strain at a final concentration of  $2 \times 10^6$  cell/mL in YNB  
191 media supplemented with 2% glucose and 6% ethanol. Cultures were incubated in an orbital  
192 shaker at 20°C and 150 rpm during 72 h, and 100  $\mu$ L samples from each culture were



193 extracted every 24 h. Aliquots were washed twice in PBS and stored in the same buffer.  
194 Cultures were then analyzed in a BD FACScanto II Cytometer (Biosciences, USA). Finally,  
195 the proportion of non-fluorescent/GFP-fluorescent cells was estimated. Experiments were  
196 performed in triplicate.

### 197 **Sequencing of the evolved lines and identification of mutations**

198 DNA extraction was performed as previously described [27, 29]. Sequencing of three parallel  
199 populations at final and intermediate stages of the evolution process was performed using  
200 the Illumina HiSeq X ten platform (BGI sequencing, China). Overall, approximately 45 million  
201 reads (paired-end) were obtained for each evolved line. The raw reads were processed to  
202 remove adaptor sequences using the Fastp tool and filtered considering a 20 phred score  
203 cut-off [35]. Reads were aligned against the *S. eubayanus* CBS12357<sup>T</sup> reference genome  
204 [36] using the Burrows-Wheeler Aligner [37]. Overall, 99% of the reads were aligned,  
205 obtaining a mean coverage of 980X. Genome sequences of 27 parental strains were  
206 previously sequenced [27], from which a list of SNPs that were unique for each of those  
207 sequenced strains was obtained, using a custom R script. To estimate the proportion of the  
208 parental genetic backgrounds in every evolved line, the alternative genotype coverage at  
209 each unique SNP coordinate was obtained using bcftools mpileup [38] [39]. De novo SNP  
210 calling in the evolved lines was performed using freebayes v 1.3.0  
211 (<https://github.com/ekq/freebayes>). The total number of SNPs was calculated using  
212 Freebayes [40] and the effect of each SNP was predicted with SnpEff [41] and the *S.*  
213 *eubayanus* CBS12357<sup>T</sup> reference genome [36]. Reads are available in the Biosample  
214 Database Project PRJNA666059.

### 215 **Genome reconstruction of the CLEt5.1 mutant**

216 The genome of the CLEt5.1 mutant was reconstructed using Nanopore sequencing coupled  
217 with Illumina sequencing. Nanopore sequencing was performed using a minION system  
218 (Oxford Nanopore, Oxford, UK). For this, DNA extraction and sequencing proceeded as  
219 previously described [29]. Overall, 26.1 million reads for Illumina and 96,000 reads for  
220 Nanopore were obtained (**Table S2**). The raw fast5 files were transformed to fastq files and  
221 debarcoded using Guppy 2.3.5 [42]. Barcode and adapter sequences were trimmed using  
222 Porechop (<https://github.com/rrwick/Porechop>) and filtered with Filtlong  
223 (<https://github.com/rrwick/Filtlong>) using a Phred score of 30. Genome assembly was  
224 performed with Canu (<https://github.com/marbl/canu>) using default settings. Additionally,  
225 two rounds of nanopolish (<https://github.com/jts/nanopolish>) and pilon  
226 (<https://github.com/broadinstitute/pilon>) were carried out. Moreover, the raw assembly was  
227 polished using the Illumina reads filtered with a Phred score of 20 (Burrows-Wheeler  
228 Aligner). The genome assembly was annotated with the pipeline LRSDAY [43] using the *S.*  
229 *eubayanus* CBS12357<sup>T</sup> reference genome as model for training AUGUSTUS [44],  
230 supported by the transcriptome assembly produced by TRINITY [45]. The completeness of  
231 the genome assembly was evaluated using BUSCO [46]. The assembly was compared with  
232 CBS12357<sup>T</sup> using nucmer (Marçais et al, 2018) to evaluate the synteny, whilst specific  
233 structural variants (SVs) were identified using MUM&Co [47]. All the parameters of the  
234 pipeline were set up as default. The enrichment analysis of Gene Ontology (GO) terms and  
235 KEGG pathways was performed using METASCAPE [48]. The identification of transcription  
236 factor binding sites in the regulatory region 500 bp upstream of the upregulated genes of the  
237 evolved strain was performed using CiiDER [49]. Reads are available in the Biosample  
238 Database Project PRJNA666059.

## 239 **RNA-sequencing and differential expression analysis**

240 RNA was extracted using the E.Z.N.A.® Total RNA Kit I (Omega Bio-tek, USA). RNA was  
241 DNase I treated (ThermoFisher, USA) and purified using the RNeasy MinElute Cleanup Kit  
242 (Qiagen, Germany). The Illumina libraries and sequencing were performed as previously  
243 described [29] in the BGI facilities (Hong Kong, China). Briefly, RNA integrity was confirmed  
244 using a Fragment Analyzer (Agilent, USA). The RNA-seq libraries were constructed using  
245 the TruSeq RNA Sample Prep Kit v2 (Illumina, USA). The sequencing was conducted using  
246 paired-end 100-bp reads on an Illumina HiSeq X Ten in a single lane for the six samples.  
247 Reads are available in the Biosample Database Project PRJNA666059. Reads were  
248 mapped to the *S. eubayanus* CBS12357<sup>T</sup> reference genome using RNAstar ver. 2.7.3 [50]  
249 and analyzed using featurecounts in R [51]. Differential expression was analyzed statistically  
250 using DESeq2 package in R [52]. Genes showing an adjusted *P*-value of 0.05 or less were  
251 considered as differentially expressed genes (DEGs). Analysis of GO term enrichment was  
252 performed with the R package enrichGO  
253 (<https://www.rdocumentation.org/packages/clusterProfiler/versions/3.0.4/topics/enrichGO>).  
254 Cytoscape was used to visualize transcription factor regulatory networks [53].

255

## 256 **RESULTS**

### 257 ***S. eubayanus* fitness sensitivity under high ethanol conditions**

258 We performed a parallel population assay to obtain high ethanol-tolerant *S. eubayanus*  
259 individuals (**Figure 1A**). For this, thirty *S. eubayanus* strains belonging to the PB-2 and PB-  
260 3 lineages, previously isolated in southern Chile (Villarrica, Coyhaique and Puyehue; [27]),  
261 were selected and characterized for microbial growth under different ethanol conditions.  
262 Initially, we used micro-cultures to evaluate biomass generation in 8%, 9% and 10% ethanol.  
263 Growth under these conditions showed long lag phases and low growth rates for all strains

264 in concentrations above 9% ethanol (**Figure 1B, Table S3**). This growth was significantly  
265 lower compared to that of the L299 wine *S. cerevisiae* control strain ( $p$ -value < 0.05,  
266 ANOVA), demonstrating a greater susceptibility of *S. eubayanus* to high ethanol  
267 concentrations (**Table S3**). Furthermore, for all tested parameters, micro-culture assays  
268 demonstrated significant phenotypic differences between strains (**Figure 1B**), representing  
269 a genetically and phenotypically heterogeneous group of strains, ideal for the parallel  
270 population assay. Based on the above, we chose 9% ethanol as our selective environment  
271 for the experimental evolution procedure (from now on referred to as EtOH).

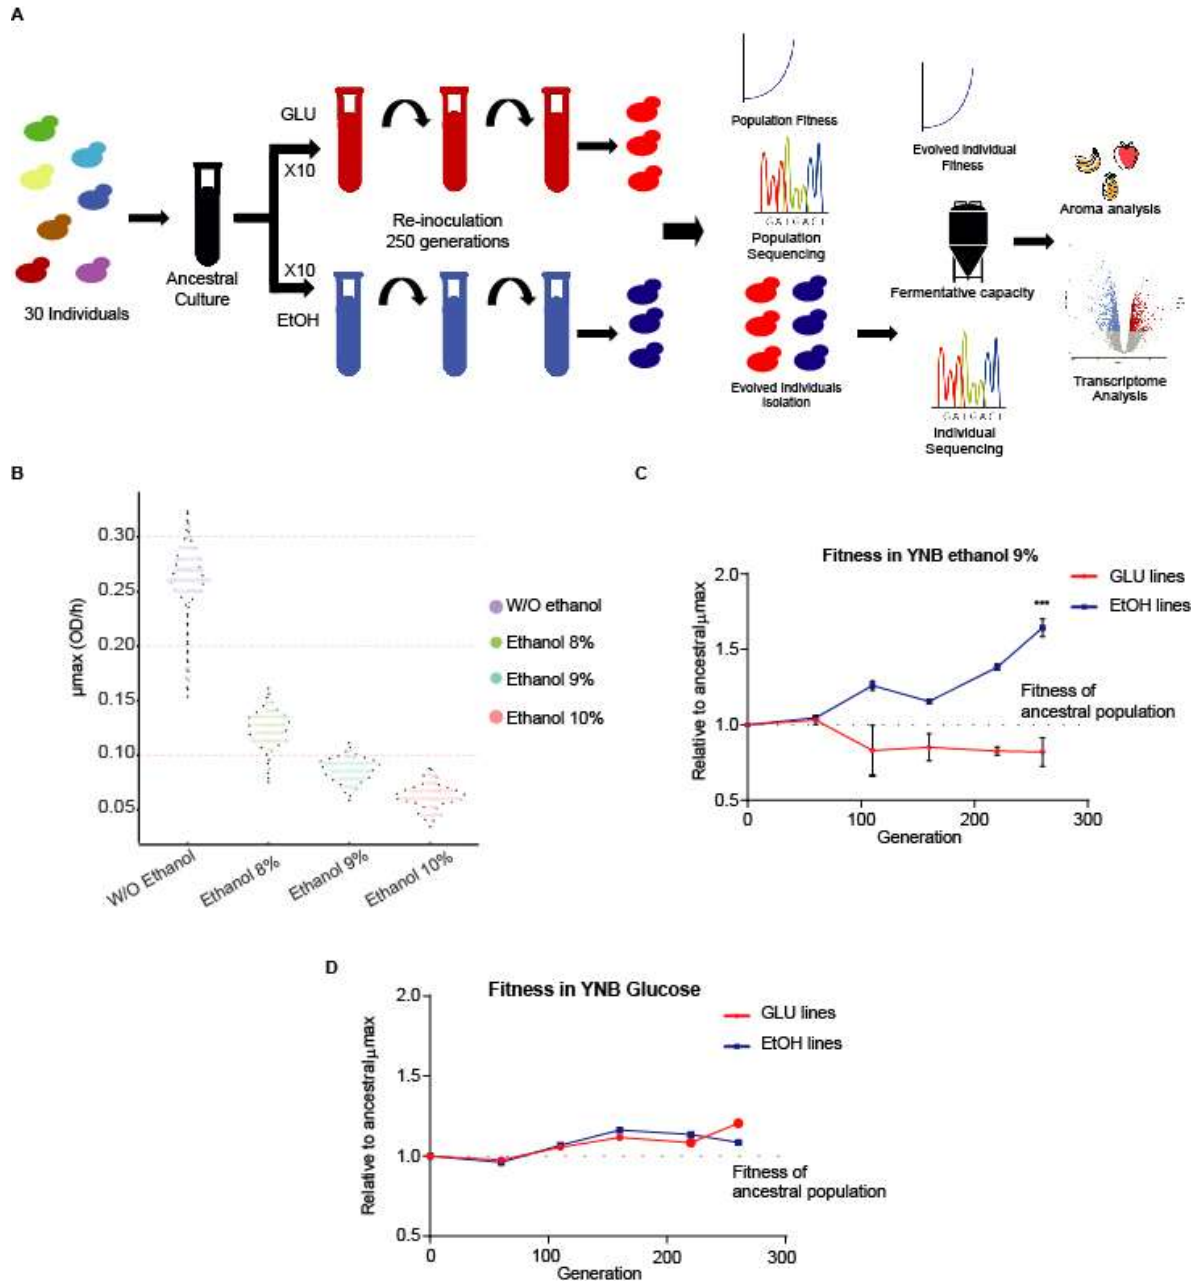

282

283 Our population assay began by mixing the thirty strains in equal proportions and subdividing  
284 them into ten mock replicates (YNB-glucose media, from now on referred to as GLU) and  
285 ten EtOH lines (**Figure 1A**). The ethanol fitness of each evolved line was evaluated at  
286 different time points during the progression of the assay (**Figure 1C**). After 260 generations  
287 (approximately six months), all GLU lines showed a significant decrease in ethanol fitness  
288 compared to the ancestral culture ( $p$ -value < 0.05, ANOVA, **Figure 1C**). In contrast, the  
289 EtOH-evolved lines showed higher maximum growth rates ( $\mu_{max}$ ) in ethanol compared to  
290 the original mixed-culture, attaining a 60% greater  $\mu_{max}$  ( $p$ -value < 0.05, ANOVA). These  
291 differences were not observed in glucose micro-cultures (**Figure 1D**). Thus, demonstrating  
292 that the evolved lines performed better in their selective environment compared to the  
293 control condition. Interestingly, we did not detect major adverse phenotypic effects in beer  
294 wort, suggesting a low accumulation of detrimental mutations (**Table S3b**).

295

296

297

298 **Genome sequencing reveals consistent strain selection in parallel populations**

299 Three GLU (GLU-1, 7 and 10) and three EtOH lines (EtOH-2, 5 and 6) were sequenced at  
300 the end of the experiment to identify the genomic changes and the pervasiveness of the  
301 different genetic backgrounds across the assay. Interestingly, all the EtOH sequenced lines  
302 showed a sustained prevalence of strain CL248.1 (belonging to PB-2 and isolated in  
303 northern Patagonia), reaching over 95% of the population's allele frequency by the end of  
304 the experimental evolution assay (**Figure 2A**). That being said, CL248.1 did not show the  
305 highest growth rate ( $\mu_{max}$ ) under ethanol 9% of the *S. eubayanus* strains considered in this  
306 study, suggesting that selection did not occur solely due to ethanol tolerance (**Table S3**). In  
307 contrast, we did not observe a consistent selection in the GLU lines, where different genetic  
308 backgrounds were found depending on the evolved line (**Figure 2A**). These results likely  
309 suggest a milder and different selection pressure in yeast when glucose is used as a  
310 selection regime, and a particular competitive fitness advantage of CL248.1 solely under  
311 EtOH selection, demonstrating a convergent phenomenon when ethanol and biotic stress  
312 are applied together.

313

314

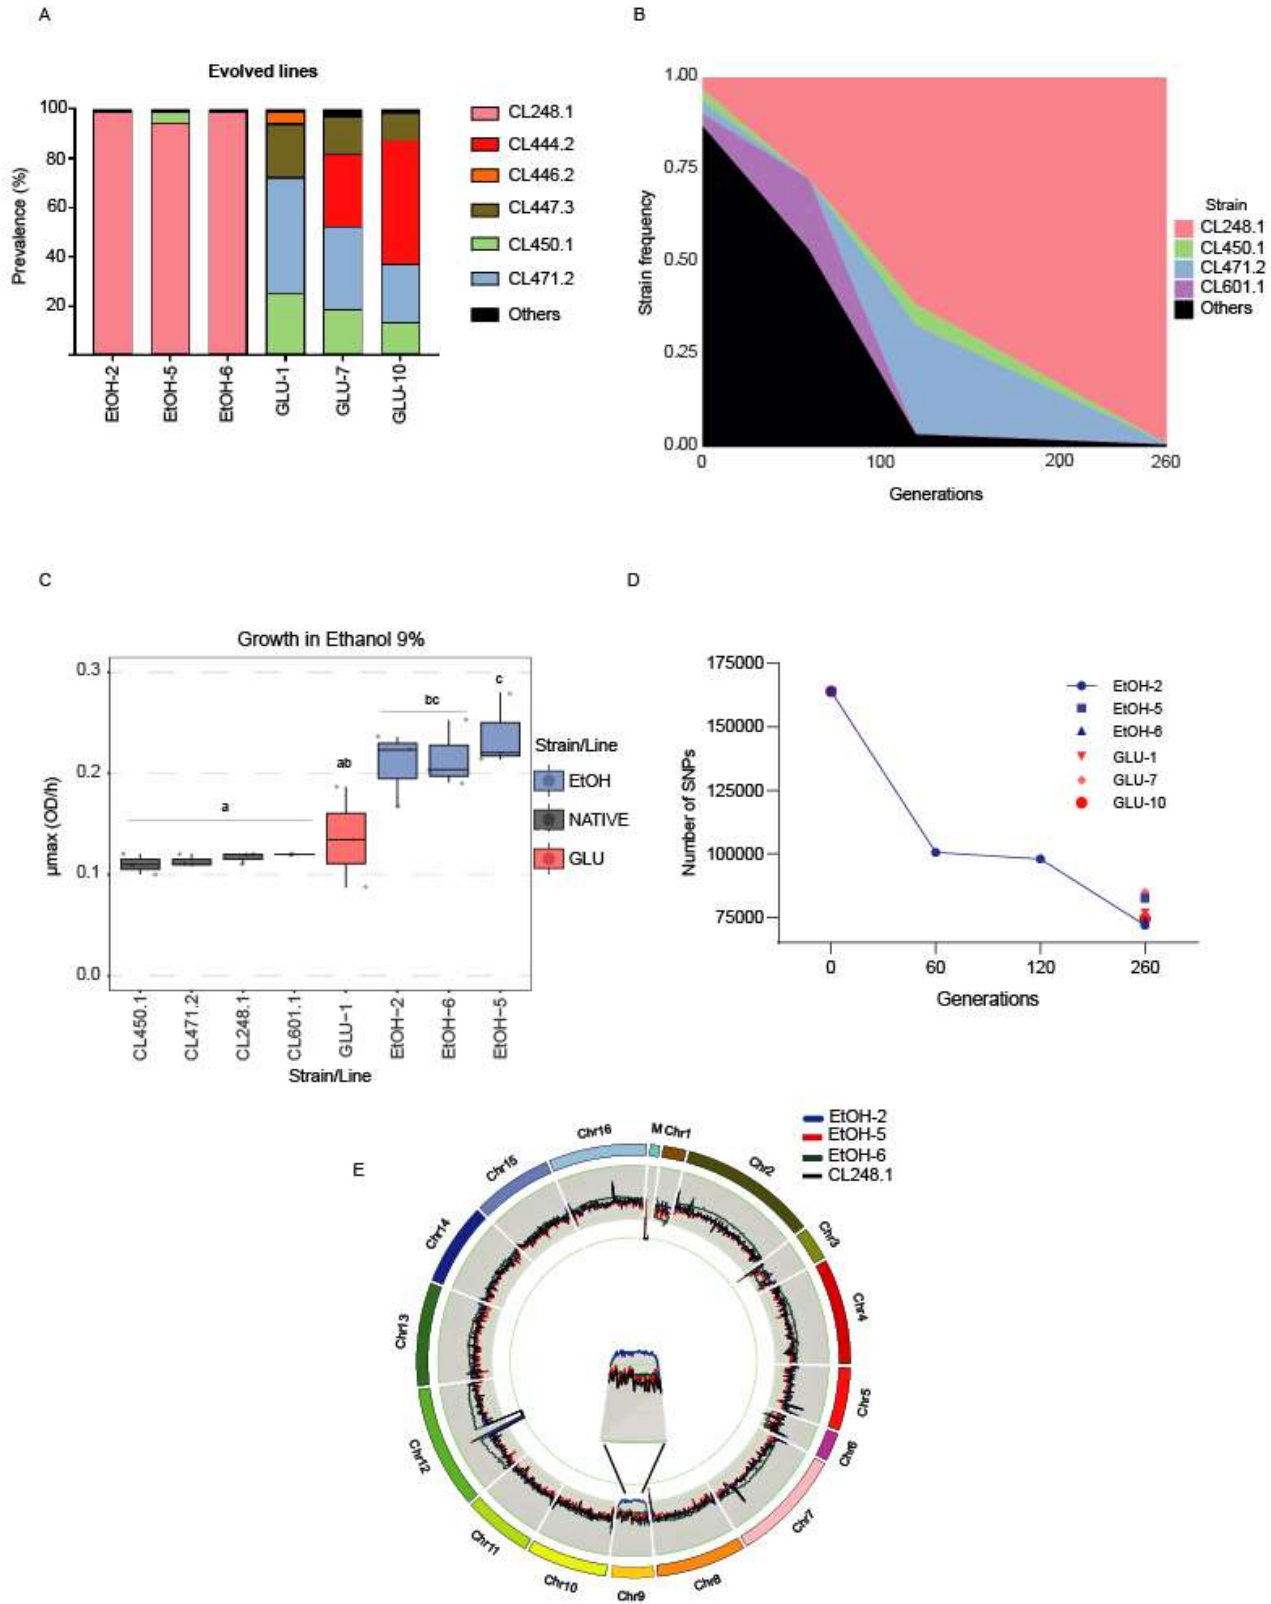

315 Figure 2. Genomic and phenotypic changes in the evolved lines.



316 (A) The presence of the prevalent genetic backgrounds in three glucose (GLU) and ethanol  
317 (EtOH) evolved lines. (B) Prevalence (frequency) of the most prominent genetic  
318 backgrounds during the evolution of line EtOH-2. (C) Ethanol 9% growth rates for the most  
319 representative parental strains and evolved lines. (D) Total number of SNPs relative to the  
320 CBS12357 reference genome at the beginning and end of the evolution assay for EtOH-5,  
321 6 and GLU-1, 7 and 10 lines. In addition, the number of SNPs during the evolution assay is  
322 shown for EtOH-2. (E) Chromosome number estimation across EtOH lines. Only the EtOH-  
323 2 line showed an aneuploidy by the end of the evolution assay (chromosome 9).

324

325 Line EtOH-2 was sequenced at different time points (0, 60, 120 and 260 generations) to  
326 identify the genotypic course of the assay and additional genotypes under selection (**Figure**  
327 **2B**). We observed a predominance of CL248.1 and CL601.1 genotypes after 60  
328 generations, demonstrating a competitive displacement of CL248.1 in the culture, together  
329 with higher fitness over the other genetic backgrounds (**Figure 2B**). Interestingly, after 120  
330 generations, four genotypes monopolized the culture, representing 96.6% of the EtOH-2  
331 line. Nevertheless, none of these parental genotypes showed high ethanol growth rates  
332 compared to the evolved lines (**Figure 2C**). A second genotype, CL471.1 reached significant  
333 frequencies (maxima 29.3%) during intermediate periods of the evolution assay. However,  
334 it was almost absent by the end of the experiment, being detected at a frequency of just  
335 0.15% in the final population. Moreover, over time, we calculated the total number of SNPs  
336 in evolved lines against the reference strain CBS12357<sup>T</sup>. We found a decrease in the  
337 number of SNPs over time across all lines relative to the ancestral culture, particularly in  
338 EtOH-2, which exhibited the greatest decay compared to other lines (**Figure 2D**).

339 To identify de novo genetic variants with a potential effect on ethanol tolerance, we used the  
340 EtOH-2 line and compared polymorphisms (SNPs and short INDELs identified using  
341 freebayes) before and after selection. We chose this line because it showed the highest  
342 homology to a single genetic background (CL248.1), allowing the identification of novel  
343 genetic variants over the raw population's genetic variation. In this way, we arbitrarily  
344 selected for polymorphisms with a putative moderate/high impact on the gene function and

345 found 34 impacted genes under these criteria (**Table S4**). Among others, we found  
346 mutations in genes such as *YPS6* and *IMA1*, encoding for a putative GPI-anchored aspartic  
347 protease [54] and a isomaltase [55], respectively. We also found a single aneuploidy in the  
348 EtOH-2 line in chromosome IX, where an extra copy was found (**Figure 2E**). Altogether, our  
349 results demonstrate how ethanol promotes a significant decrease in genetic variability due  
350 to genotype selection coupled with the emergence of new adaptive mutations vital for  
351 ethanol survival in biological processes such as stress damage and sugar metabolism.

352

353

354 **Ethanol-evolved individuals have greater fermentation capacity and maltotriose**  
355 **consumption**

356 We determined the fitness cost of ethanol adaptation in 24 different environmental  
357 conditions for those EtOH adapted individuals isolated after 260 generations of selection.  
358 For this, we randomly isolated two clones from each EtOH line and estimated growth rates  
359 in micro-cultures considering diverse phenotypic growth conditions, including high  
360 temperature, different carbon sources, and oxidative and osmotic stress (**Table S5**). To  
361 control for adaptive mutations in YNB laboratory media, we also isolated two colonies from  
362 three GLU lines. In general, individuals from EtOH-evolved lines showed higher  $\mu_{max}$  in  
363 ethanol (**Figure 3A**), and also for a greater number of conditions, compared to GLU-evolved  
364 individuals and the ancestral culture ( $p$ -value < 0.05, ANOVA, **Table S5**). These conditions  
365 included greater growth rates in sources such as glucose, maltose and fructose, together  
366 with resistance to oxidative ( $H_2O_2$ ) and osmotic stresses (sorbitol 20%) (**Figure 3B**),  
367 suggesting that selection improved general stress tolerance in these evolved strains.  
368 Interestingly, we found that one EtOH evolved individual (CLEt5.1, isolate n°1 from the  
369 EtOH-5 line) exhibited greater ethanol tolerance, but a lower growth rate under high  
370 temperature (34°C) and an ionic detergent (SDS 0.001%, **Figure 3B**), indicating the  
371 existence of a trade-off.

372 To determine the relative fitness of EtOH and GLU evolved individuals, we carried out a  
373 competition assay in YNB-glucose supplemented with 6% ethanol, against a recombinant  
374 *S. cerevisiae* that constitutively expresses GFP (**Figure S1**). We observed that all tested  
375 strains were unable to outcompete *S. cerevisiae*; however, significant differences were  
376 found in the final proportion of the tested strains at the end of the experiment ( $p$ -value <  
377 0.05, ANOVA). For example, strain CLEt9.1 was almost absent at the end of the competition  
378 assay (relative frequency < 0.1), while CLEt2.2 was found to represent 31% of the cells

379 quantified in the final culture (**Figure 3C**). These results demonstrate fitness differences  
 380 between EtOH and GLU isolated individuals.

381

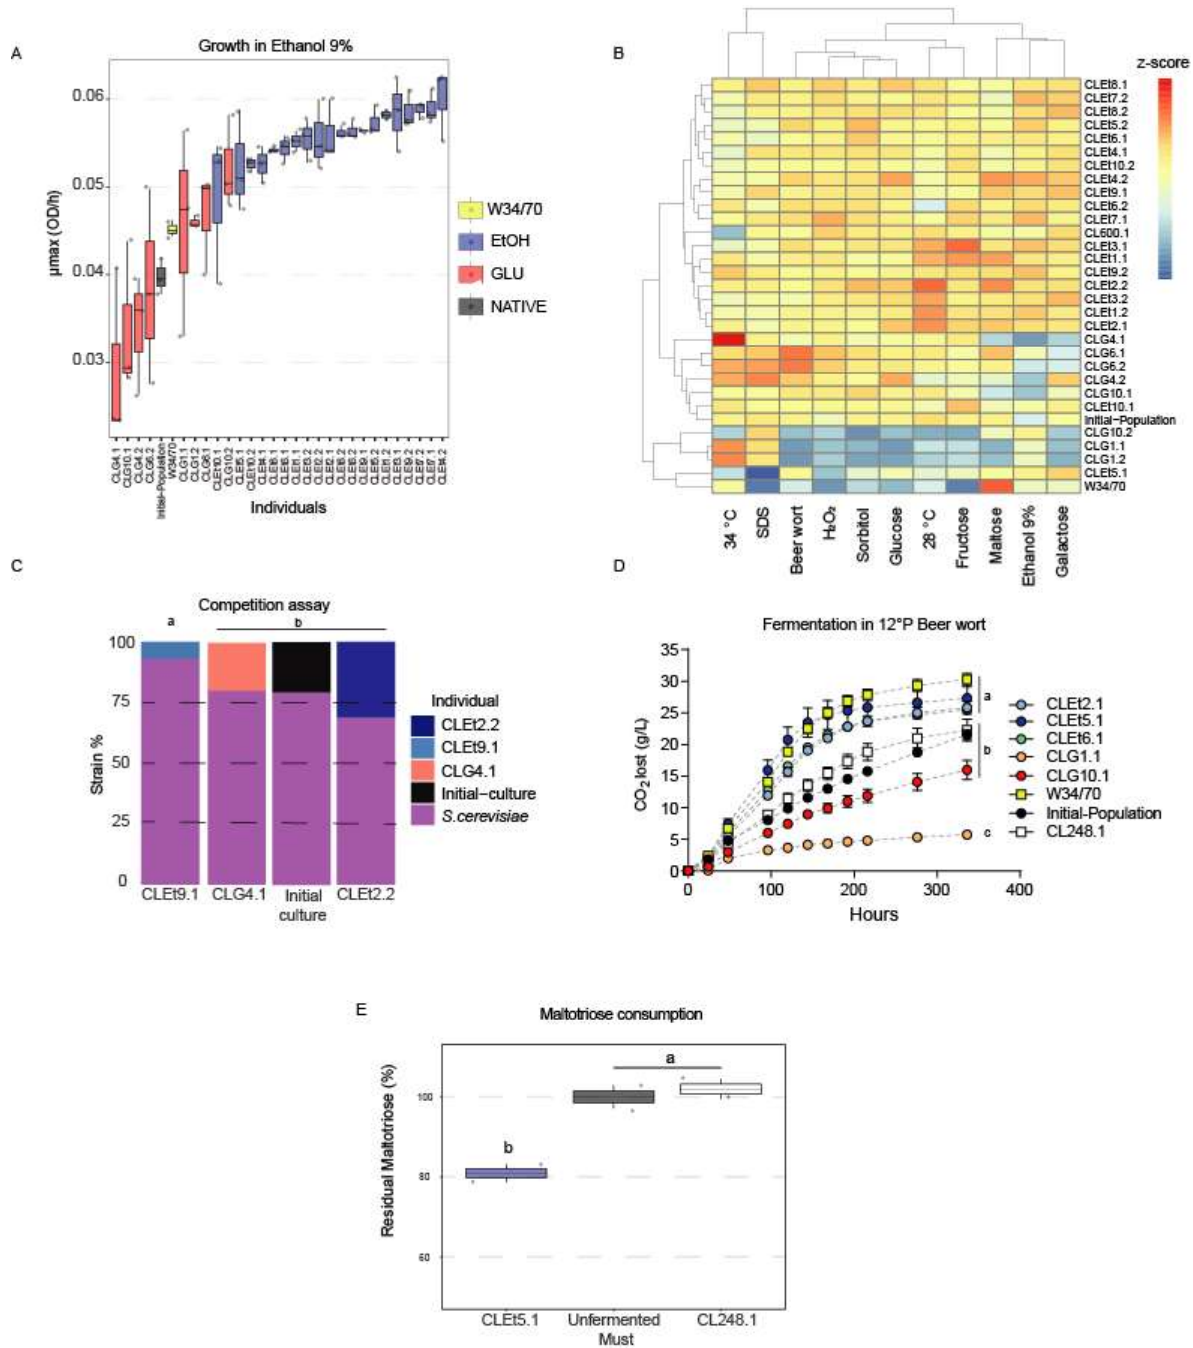

382

383

384 **Figure 3. Phenotypic profiling of evolved individuals.** (A) Growth rates under YNB-  
385 glucose-ethanol 9% of different evolved individuals. (B) Phenotypic heatmap based on  
386 micro-culture growth rates of EtOH and GLU-evolved individuals, evaluated in 11 different  
387 conditions. (C) The evolved strains were challenged using a GFP-mutant *S. cerevisiae* in  
388 YNB media supplemented with ethanol at 9%. The strain frequency of the evolved  
389 individuals was evaluated using flow cytometry. (D) Fermentation in 12 °P beer wort of  
390 different evolved individuals. The fermentative capacity was estimated from the CO<sub>2</sub> lost at  
391 different time-points. The statistical differences were calculated after 216 h of fermentation  
392 using ANOVA. (E) Maltotriose consumption in YNB maltotriose 2% micro-cultures.

393

394 Additionally, we evaluated the fermentative capacity in small-scale lager wort fermentations  
395 at low temperature (12 °C) of three EtOH and two GLU evolved individuals. The selected  
396 strains were monitored for 15 days, and their fermentative capacity was estimated by  
397 measuring CO<sub>2</sub> loss and sugar consumption throughout the fermentative process (**Figure**  
398 **3D**). Surprisingly, all the EtOH-evolved individuals showed a similar fermentative profile  
399 compared to the commercial strain, where no significant differences were found in terms of  
400 total CO<sub>2</sub> loss ( $p$ -value < 0.05, ANOVA). Furthermore, the best-evolved isolate (CLEt5.1)  
401 showed a 22.6% increase in loss of CO<sub>2</sub> compared with the ancestral culture after 14 days  
402 of fermentation (**Figure 3D** and **Figure S2A**,  $p$ -value > 0.05, ANOVA), and also exceeded  
403 the fermentative performance, in terms of fermentation rate, of its parental genetic  
404 background CL248.1 (**Figure 3D**, **S2B**, and **S2C**). Moreover, sugar consumption differed  
405 between the W34/70 commercial strain and the evolved individuals. Although the isolates  
406 were able to consume all the glucose, maltose, and fructose found in the wort (**Figure S2D**),  
407 no maltotriose consumption was observed ( $p$ -value < 0.05, ANOVA, **Table S6**) in the  
408 evolved strains. We only detected maltotriose consumption under fermentation conditions  
409 in the lager commercial strain, in agreement with the inability of *S. eubayanus* to use this  
410 carbon source (**Figure S2D**, [23]). To further analyze maltotriose consumption, we  
411 quantified the remaining maltotriose concentration after a 5-day incubation period of the  
412 evolved individuals in YNB synthetic media supplemented with 2% maltotriose as the sole  
413 carbon source (**Figure 3E**). Interestingly, we detected 19.1% maltotriose consumption in the

414 evolved strain CLEt5.1, while no consumption was found in CL248.1 (**Figure 3E**). These  
415 results suggest genomic and molecular changes leading to maltotriose metabolism in this  
416 genetic background that only arise when maltotriose is used as the sole carbon source.

417

418

#### 419 **Identification of *de novo* genetic variants in the EtOH evolved strain CLEt5.1**

420 The genome of the EtOH-evolved individual CLEt5.1 was sequenced by coupling Nanopore  
421 and Illumina technologies to elucidate the genetic origin of the phenotypic changes acquired  
422 through the evolution process. We obtained a high-quality assembly and identified 5,946  
423 genes in the final genome annotation, organized in 37 scaffolds (**Figure 4, Table S2 and**  
424 **Table S7a**). The completeness analysis using BUSCO showed that the *de novo* assembly  
425 contained almost all the expected set of genes for a member of the *Saccharomyces* genus  
426 (97.5%). By comparing the scaffolds of the assembly against the CBS12357<sup>T</sup> reference  
427 genome, high synteny between genomes was observed, except for an evident translocation  
428 between chromosomes IV-R and XVI-L (**Figure 4**). Therefore, we proceeded to identify  
429 structural variants between CLEt5.1 and its parental background (CL248.1) using MUM&Co  
430 [47]. In this way, we identified 100 structural variants (Deletions: 47, Insertions: 41,  
431 Duplications: 10, Inversions: 0 and Translocations: 2, **Table S7b**), primordially INDELS and  
432 confirming the translocation between chromosomes IV-R and XVI-L of 980 kb. Additionally,  
433 we found a 47 kb deletion in chromosome XII, and two 24 kb and 39 kb duplications in  
434 chromosomes VII and IV, respectively. Among the genes present in the chromosome VII  
435 duplication, we found *VID30*, which is involved in the regulation of carbohydrate metabolism  
436 and the balance of nitrogen metabolism towards glutamate production, and *HAP2*, a  
437 transcription factor which is predicted to regulate many of the proteins induced during the  
438 diauxic shift [56](**Table S7c**). SNP calling using freebayes detected 1,006 high quality SNPs.

439 To better understand the molecular basis of ethanol adaptation, we searched for  
440 polymorphisms across the CLEt5.1 genome that could generate moderate or high impact  
441 mutations on the gene function (based on snpeff predictions). We found 11 genes with  
442 significant polymorphisms between CLEt5.1 and the native CL248.1 strain (**Table S7d**). For  
443 example, we found a missense variant in *PUT4*, which encodes for a proline permease  
444 essential in proline assimilation during fermentation [57]. Similarly, we found a frameshift in  
445 *IRA2*, which encodes for a GTPase-activating protein, and previously related to high-  
446 temperature fermentation [58] and low glucose-growth defect rescue [59]. These results  
447 demonstrate that this relatively short period of ethanol adaptation promoted punctual, small  
448 and large rearrangements, which, taken together may be responsible for the phenotypic  
449 differences between the CLEt5.1 and CL248.1 strains.

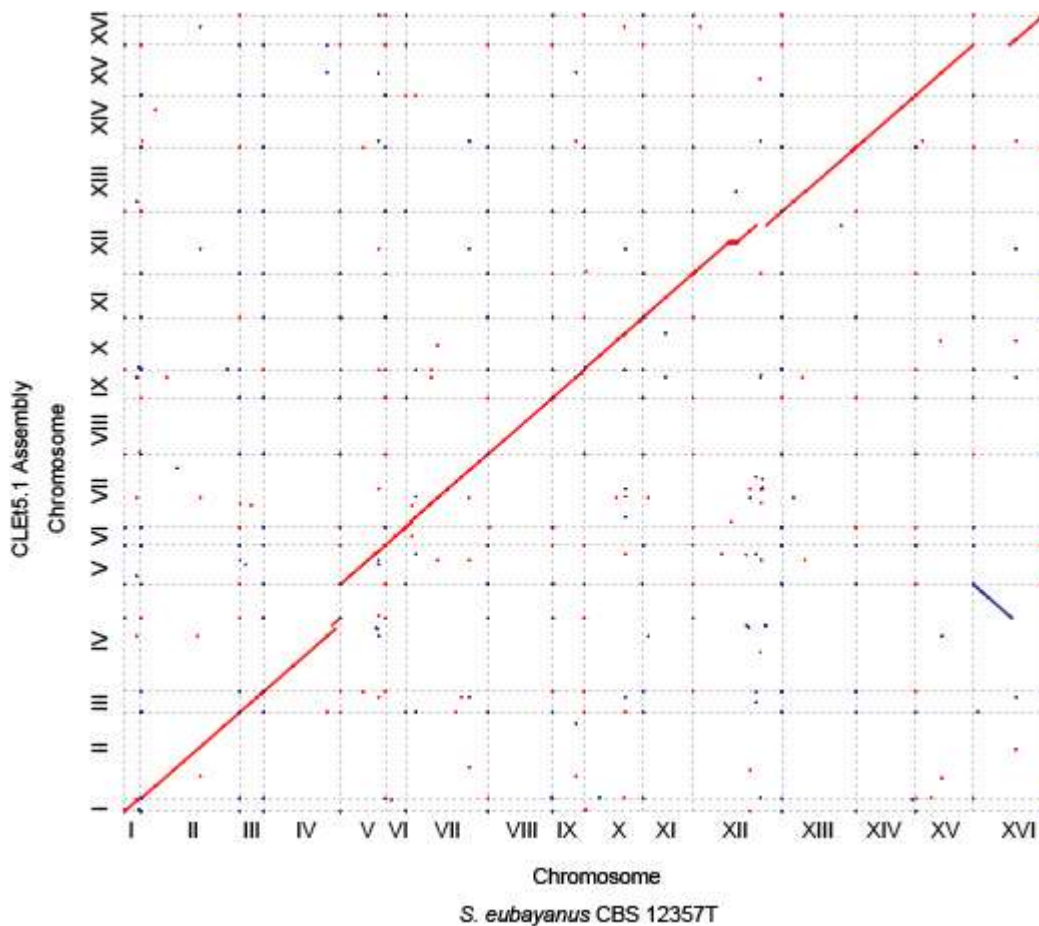

451 **Figure 4. Genome synteny analysis of the EtOH evolved CLEt5.1 strain.** Dot plot  
452 representation of DNA sequence identity between the *S. eubayanus* CBS12357<sup>T</sup> strain and  
453 the EtOH evolved CLEt5.1 strain. A single translocation was found between chromosome  
454 IV and XVI.

455

456 **Transcriptome and organoleptic analysis of the CLEt5.1 evolved strain under beer**  
457 **fermentation**

458 To determine the impact of genetic changes in metabolic processes during wort fermentation  
459 in EtOH adapted individuals, we used a transcriptome approach. This allowed us to identify  
460 differentially expressed genes (DEGs) between the CLEt5.1 and the CL248.1 parental strain  
461 after 24 h of fermentation in a 1.5 L fermenter. Overall, we observed 92 DEGs (Fold change  
462 > 0.7 and FDR < 0.05, **Figure 5A** and **Table S8**), of which 59 and 33 were up- and down-  
463 regulated in the CLEt5.1 strain, respectively. Enrichment analysis of GO terms in up-  
464 regulated genes revealed that diverse biological and molecular pathways, including sulfur  
465 compounds, methionine metabolism, and several cellular amino acid metabolic processes  
466 were enriched in the evolved strain (**Table S8**). In contrast, down-regulated genes were  
467 significantly enriched in alpha-amino acid metabolism and pheromone response  
468 metabolism, together with cofactor and vitamin binding molecular functions (**Table S8**).  
469 Similarly, KEGG enrichment analysis highlighted that genes within several pathways were  
470 differentially expressed between genotypes. For example, assimilatory sulfate reduction,  
471 cysteine and methionine metabolism, seleno-compound metabolism and biosynthesis of  
472 antibiotics pathways were enriched in the up-regulated genes set (**Table S8**). In contrast,  
473 we found a significant enrichment of the amino acid biosynthesis pathway among down-  
474 regulated genes ( $p$ -value < 0.01, hypergeometric test). Interestingly, these two analyses  
475 highlight that several DEGs were related to nitrogen and amino acid uptake, stress  
476 tolerance, and faster diauxic shift, suggesting that nitrogen uptake and a rapid stress  
477 response play essential roles during fermentation in this evolved strain.



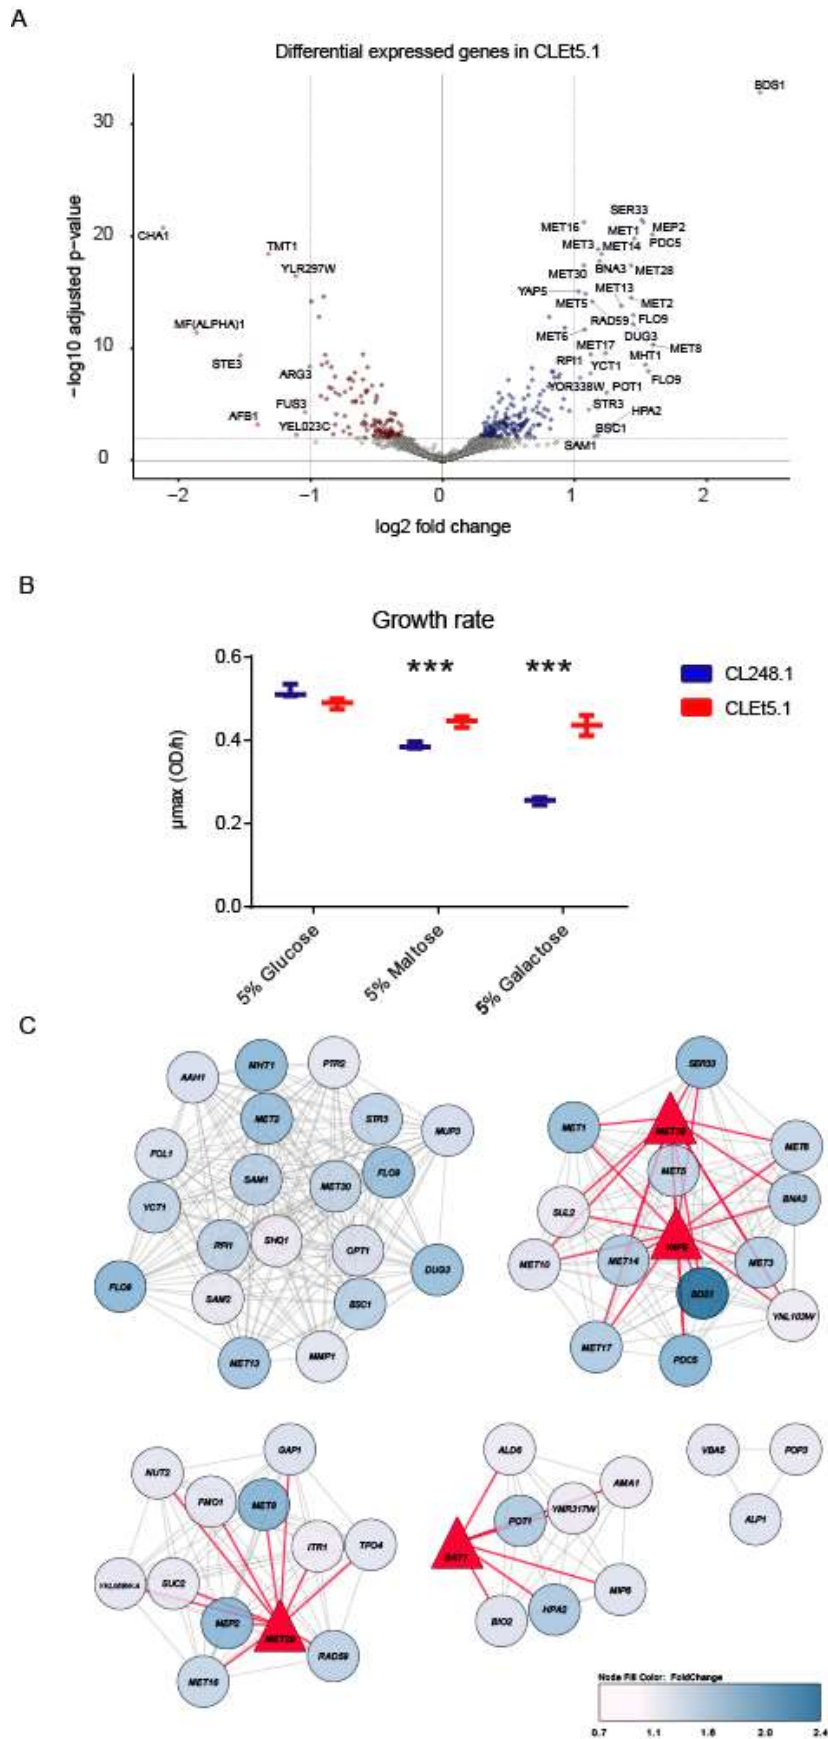

479

480 **Figure 5. Differential gene expression analysis between the EtOH evolved CLEt5.1**  
481 **strain and its native parental strain under beer wort fermentation conditions.** The  
482 transcriptome of the CLEt5.1 EtOH evolved strain was evaluated and compared against the  
483 CL248.1 native strain under beer wort fermentation conditions. (A) The volcano plot depicts  
484 differentially expressed genes between CLEt5.1 and CL248.1 (B) Relative growth rates of  
485 CLEt5.1 and CL248.1 strains shifted from two 24 hours 5% glucose pre-cultures to 5%  
486 maltose and 5% galactose media. (C) Network analysis in upregulated genes in CLEt5.1  
487 depicting the most relevant hubs differently regulating genes between CLEt5.1 and CL248.1.  
488 Transcription factors are shown in red triangles, while TF-gene connections are shown in  
489 red lines.

490

491 To evaluate the fast diauxic shift and the capacity of these two strains to switch from glucose  
492 to other disaccharides, we estimated their growth capacity under maltose and galactose  
493 after two 24 h pre-cultures in 5% glucose. In agreement with our transcriptome results, the  
494 evolved strain showed a significantly greater growth rate compared to CL248.1 under 6%  
495 maltose and 6% galactose concentrations after long glucose incubation periods (**Figure 5B**).

496 Additionally, to identify possible common regulatory elements of the up-regulated genes, we  
497 analyzed their promoter sequences (500 bp upstream of the transcription start site), and  
498 found a significant enrichment of transcription factor binding sites ( $p$ -value < 0.05, Fisher's  
499 exact test) for transcription co-activators of the Cbf1-Met4-Met28p complex (methionine  
500 metabolism), Dal80p and Uga3p (activators of nitrogen metabolism), Tye7p (glycolytic  
501 genes activator) and Sfl1p (repression of flocculation-related genes, and activation of stress  
502 responsive genes, **Table S9**). Additionally, we used Cytoscape to visualize the resulting  
503 network predicting regulatory interactions from the set of upregulating genes (**Figure 5C**).

504 According to our network model, we found four transcription factors: Met28p, Met32p, Gatp  
505 and Yap5p modulating the expression of these up-regulated genes in CLEt5.1. Interestingly,  
506 Yap5p is known to be involved in the diauxic shift [60]. These results highlight a  
507 transcriptional rewiring in CLEt5.1 for genes related with nutrient acquisition, stress

508 tolerance and methionine metabolism during the evolution of tolerance to fermentation  
509 stress.

510 During the fermentation process, we subjectively perceived that the organoleptic properties  
511 of the beers produced by the evolved strain differed from those of the parental native strain.  
512 Therefore, to determine how the transcriptional rewiring and genomic changes impacted the  
513 production of volatile compounds and the beer profile in the CLEt5.1 evolved strain, we  
514 quantified volatile compound production using HS-SPME-GC/MS at the end of fermentation  
515 (day 15). As expected, we found significant differences in the composition of volatile  
516 compounds produced in beer between the evolved and parental strains ( $p$ -value < 0.05,  
517 paired t-test, **Figure 6A, Table S10**). In general, the evolved clone showed lower levels of  
518 ester compounds, such as isoamyl acetate and ethyl octanoate ( $p$ -value < 0.05, ANOVA).  
519 Additionally, we detected high levels of benzaldehyde 4-methyl (aromatic aldehyde) and  
520 ethyl hexadecanoate in the evolved strain compared to the native genetic background, which  
521 could confer a fruity aroma to the beer similar to those found in lager beers. The most  
522 interesting differences were found in terms of off-flavors. We detected a significantly lower  
523 production of 2-Methoxy-4-vinylphenol (4-vinyl guaiacol) in the evolved strain, likely  
524 reducing its clove-like flavor, which is typically found in fermented beverages by wild strains  
525 ( $p$ -value < 0.05, ANOVA, **Figure 6A**). Interestingly, we did not find mutations in the *FDC1*  
526 and *PAD1* coding regions, or a significant difference in gene expression for *FDC1* ( $\log_2FC$   
527 = -0.038,  $p$ -value adjusted = 0.838) and *PAD1* ( $\log_2FC$  = -0.0095,  $p$ -value adjusted = 0.965)  
528 between both strains. However, a series of mutations in the regulatory regions of both genes  
529 were found in CLEt5.1, which could alter expression levels in later fermentation stages.  
530 These results suggest that the evolution process significantly impacted the volatile  
531 compound profile of beers produced by CLEt5.1, emulating the domestication process that  
532 modified several commercial yeasts.

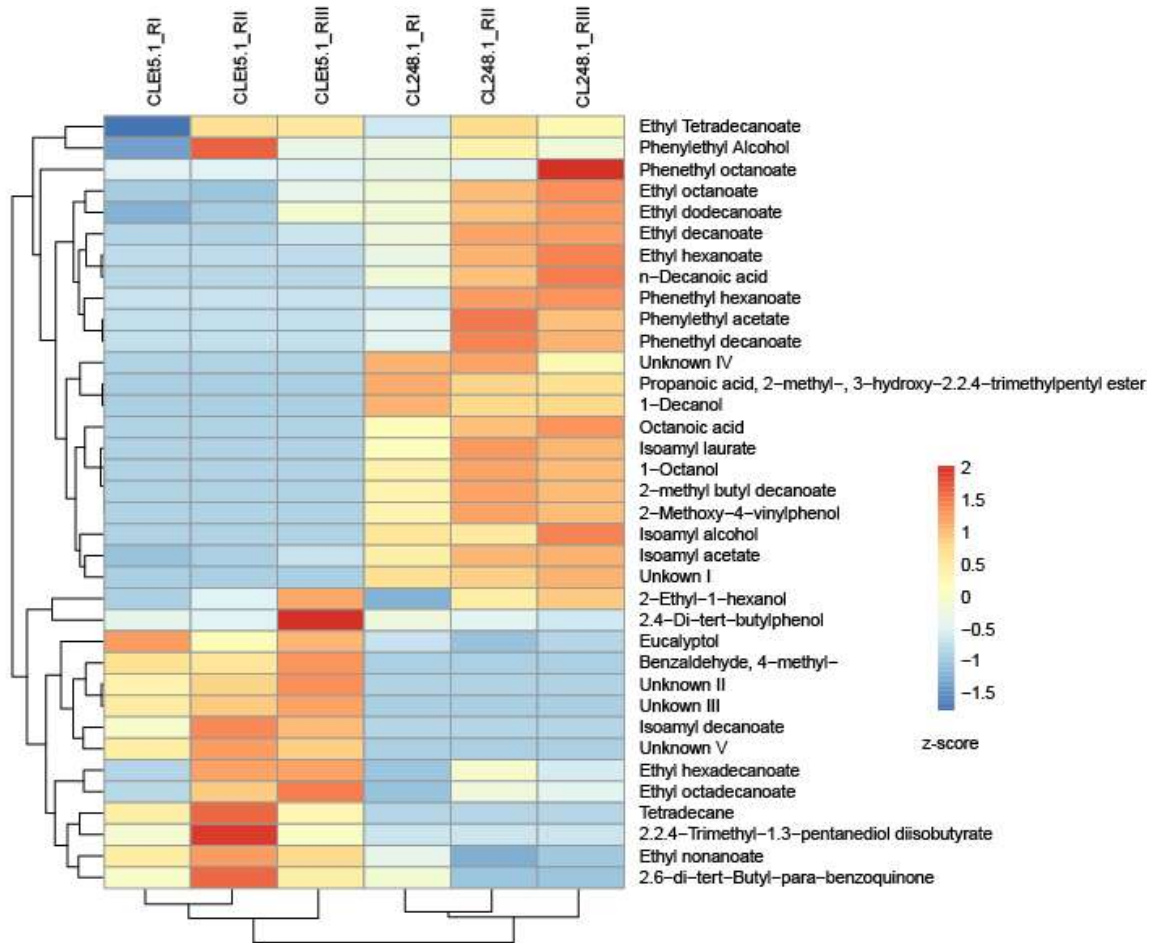

533 Figure 6

534

535 Figure 6. **Volatile compound production on beer wort.** The final beer from EtOH evolved  
536 CLEt5.1 and its parental strain CL248.1 was analyzed using HS-SPME-GC/MS. The relative  
537 abundance of each compound detected was evaluated and a heatmap was constructed.  
538 The compounds were grouped in accordance to their relative abundance.

539

## 540 DISCUSSION

541 Human-driven selection associated with yeast domestication in fermentative environments  
542 has been extensively reported in *S. cerevisiae* and related hybrids [14, 15]. However, the  
543 genetic basis and molecular changes in other *Saccharomyces* genomes associated with  
544 alcoholic beverages is still unclear. In our study, we have reconstructed the putative

545 domestication history of the yeast *S. eubayanus* under biotic and abiotic stresses, using a  
546 panmictic founding population that simulated the natural process of adaptive evolution, and  
547 using an ethanol environment as the selective agent. We used dozens of wild genotypes in  
548 a single culture, in order to replicate the natural genetic variability of these organisms. We  
549 observed that a single genetic background, CL248.1, systematically outcompetes the  
550 others, acquiring *de novo* mutations and improving basal ethanol tolerance. Interestingly,  
551 the time-course of this competitive displacement was complex, involving genotype selection  
552 and innovations throughout the assay (key adaptive mutations) that were constantly  
553 replaced by others during the "fast-motion" evolution time-course. Thus, the evolved  
554 lineages derived from our founding genetic background exhibited higher ethanol growth  
555 rates compared to their ancestors, demonstrating a rapid response to selection, and so  
556 adapted successfully to their new environment. However, CL248.1 was not the best ethanol-  
557 tolerant strain, suggesting that pre-existing variants, together with *de novo* mutations,  
558 combined to positively-affect fitness in this strain. In this sense, it has been demonstrated  
559 that pre-existing and *de novo* genetic variants can both drive long term adaptation to  
560 environmental changes in yeast [61]. This indicates that not only a fitness advantage related  
561 to a given environmental selection pressure is essential for directional selection to occur in  
562 populations [62], but also that a combination of standing genetic variation with some  
563 genomic plasticity for beneficial mutations are essential [63]. In this way, the success of an  
564 individual is established in such a competitive environment [64]. Our results show that both  
565 pre-existing genetic variation and *de novo* mutations of a range of effects were important in  
566 explaining rapid evolution in this ecological context [65, 66]. Importantly, the *Saccharomyces*  
567 "make-accumulate-consume (ethanol)" life strategy is fundamental for withstanding the  
568 antimicrobial effects of ethanol in a complex population [67, 68]. Thanks to this, multiple  
569 *Saccharomyces* genotypes were selected, domesticated, and used over centuries in the  
570 beer industries, including the *S. pastorianus* hybrid [14, 15].

571 Domestication signatures in yeast, as a result of the human-domestication syndrome,  
572 included genomic changes in the *S. cerevisiae* and *S. eubayanus* genomic portions leading  
573 to faster fermentation rates under low temperatures, a more moderate organoleptic  
574 complexity, and the absence of off-flavors in beers [14, 20]. Under the premise that  
575 evolutionary experiments can lead to unexpected and somewhat counterintuitive results  
576 [69], we evaluated the beer fermentation performance of *S. eubayanus* evolved individuals.  
577 Interestingly, evolved individuals exhibited a similar fermentation performance compared to  
578 lager yeast, suggesting in turn that ethanol, together with competitive displacement, could  
579 be the leading drivers of yeast domestication in brewing environments. This persistent  
580 directional selection involved correlated selection of other traits, such as osmotic stress  
581 tolerance and efficient nitrogen uptake [70]. In general, domesticated fungi used in  
582 fermented foods exhibit genomic rearrangements, fewer spores and produce desirable  
583 volatile compounds [9]. These domestication signatures have been reported in other  
584 systems, such as *Aspergillus* and *Penicillium*, where a transition to environments rich in  
585 carbon and nitrogen sources led to extensive metabolism remodeling when used to produce  
586 cheese [8, 9].

587 Ethanol-evolved individuals presented a series of genomic changes related to yeast  
588 domestication, such as aneuploidy and chromosomal rearrangements [16]. Furthermore,  
589 signatures of trait domestication are evident in evolved individuals showing improved stress  
590 resistance, fast fermentation rates, lower organoleptic complexity and a lower production of  
591 phenolic off-flavors [14]. *S. cerevisiae* beer strains are characterized by strong  
592 domestication signatures in their genomes, including polyploidies, the decay of sexual  
593 reproduction, and maltotriose consumption [16]. Interestingly, one of our strains was able to  
594 consume maltotriose, which is another key domestication hallmark. In terms of the molecular  
595 mechanisms that explain their increased fermentative capacity, we observed that some

596 stress response genes were either mutated or up-regulated in the ethanol-evolved line  
597 compared to its parental genetic background. In this way, the mutations and genomic  
598 rearrangements found in the CLEt5.1 evolved individual could explain the transcriptional  
599 rewiring and improved fermentative profile. Indeed, ethanol exposure leads to the  
600 recruitment of error-prone DNA polymerases, causing DNA replication stress and increased  
601 mutation rates [71]. Accordingly, we found that *RAD59* (involved in DNA double-strand break  
602 repair) was overexpressed in the evolved strain CLEt5.1, likely indicative of a mechanism  
603 that counteracts the mutagenic effect of ethanol [72]. Other overexpressed genes could also  
604 be directly related to an increased fermentative capacity, such as *SUC2*, *YAP5* and *MET*,  
605 which could promote glucose uptake, a dynamic diauxic shift, and the accumulation of S-  
606 Adenosylmethionine, respectively [73, 74 2013]. In this context, genomic rearrangements,  
607 such as the duplication found in chromosome VII containing *HAP2*, which is involved in  
608 promoting the diauxic shift, are in agreement with these findings. Furthermore, previous  
609 reports in lager yeast demonstrated that the accumulation and exogenous supplementation  
610 of S-Adenosylmethionine promotes an increase in the fermentative capacity of yeast under  
611 high-gravity wort [75].

## 612 **Concluding remarks**

613 In summary, the results found in our study could be applied to determine the domestication  
614 dynamics of the *S. eubayanus* genomic portion in the lager strain, given the occurrence of  
615 similar desirable traits for beer. Based on multiple analyses, we provide evidence of the  
616 intermediate evolutionary changes in *S. eubayanus*, which have direct implications in the  
617 generation of novel yeasts for the industry. In this way, genomic changes promote a  
618 transcriptional rewiring that induces a favorable response in a fermentative environment. For  
619 the first time, these findings provide novel insights into the genomic and phenomic changes

620 in wild *S. eubayanus* leading to faster wort fermentation rates and desirable organoleptic  
621 complexity, demonstrating its broad feasible use in the beer industry.

622

623

## 624 **ACKNOWLEDGEMENTS**

625 This research is supported to FC by Comisión Nacional de Investigación Científica y  
626 Tecnológica CONICYT FONDECYT [1180161] and Millennium Institute for Integrative  
627 Biology (iBio). WM is supported by CONICYT FONDECYT [grant 3190532]. CV is supported  
628 by CONICYT FONDECYT [grant 3170404]. JM is supported by ANID FONDECYT  
629 POSTDOCTORADO [grant 3200545]. RN is supported by FIC 'Transferencia Levaduras  
630 Nativas para Cerveza Artesanal' and Fondecyt grant [1180917]. We thank Michael Handford  
631 (Universidad de Chile) for language support.

632

## 633 **SUPPLEMENTARY MATERIAL**

### 634 **SUPPLEMENTARY FIGURES**

635 Figure S1. **Competition assay of evolved individual in ethanol 9%.**

636 Figure S2. **Fermentative capacity of the evolved individuals.** (A) The fermentative  
637 capacity is indicated as a percentage of the capacity of the *S. pastorianus* control strain  
638 (W34/70) at 7 days. The fermentative capacity was estimated from the loss of CO<sub>2</sub> over  
639 time. All assays were performed in triplicate. (B) The fermentative capacity was also  
640 determined at 14 days. (C) The velocity of the fermentation was estimated and (D) the  
641 residual sugars and metabolites in the wort were evaluated using HPLC.

642



643 **SUPPLEMENTARY TABLE LEGENDS**

644 **Table S1. Native *S. eubayanus* strains used in the experimental evolution assay.** The  
645 strain ID and the location of isolation site are indicated.

646 **Table S2. Bioinformatics Summary statistics**

647 **Table S3. Growth kinetic parameters in glucose and ethanol of the native parental**  
648 **strains used for the ancestral culture.** Growth parameters  $\mu_{\max}$  (OD/hr), OD max (OD)  
649 and lag phase (1/hr).

650 **Table S4. SNPeffect analysis of the novel polymorphisms in EtOH-2.** Snpeffect analysis  
651 of the novel/fixed polymorphisms in EtOH-2 after 260 generations

652 **Table S5. Phenotype data of evolved individuals.** The data shows the average  $\mu_{\max}$   
653 across three replicates and the standard deviation (SD) for diverse growth conditions,  
654 including high temperature (28°C and 34°C), different carbon sources (glucose, fructose,  
655 maltose, galactose, xylose), and oxidative (ethanol 9%, 3 mM H<sub>2</sub>O<sub>2</sub>) and osmotic stress  
656 (beer wort, SDS 0.001%, Sorbitol 20%).

657 **Table S6. Sugar consumption and metabolite production of the evolved individuals**  
658 **from fermentations in beer wort.** Sugar consumption (g/L) and metabolite production (g/L)  
659 are informed.

660 **Table S7. Structural variants identified in CLEt5.1 using MUM&Co.** A. CLEt5.1 genome  
661 assembly and annotation statistics. The genome assembly of CLEt5.1 using Nanopore and  
662 Illumina sequencing technology was used to calculate several assembly statistics. B. All  
663 structural variants. C. Duplicated genes present in the chromosome IV – chromosome XVI  
664 duplication in CLEt5.1. D. High/moderate SNPeff prediction of SNPs and short INDELs in  
665 CLEt5.1

666 **Table S8. Differential gene expression between CL248.1 and CLEt5.1 under beer wort.**

667 A. Gene expression results. B. Upregulated and C. Downregulated genes in CLEt5.1. R1,

668 R2 and R3 represent the three biological replicates for each genotype.

669 **Table S9. Enrichment analysis of Transcription Factor binding sites in regulatory**  
670 **regions of upregulated genes using CiiDER.**

671 **Table S10. Volatile compound production in CL248.1 and CLEt5.1 in beer wort.**

672

673 REFERENCES

- 674 1. Causton HC, Ren B, Koh SS, Harbison CT, Kanin E, Jennings EG, et al. Remodeling of yeast  
675 genome expression in response to environmental changes. *Mol Biol Cell*. 2001;12(2):323-37. doi:  
676 10.1091/mbc.12.2.323. PubMed PMID: 11179418; PubMed Central PMCID: PMCPMC30946.
- 677 2. Tamari Z, Yona AH, Pilpel Y, Barkai N. Rapid evolutionary adaptation to growth on an  
678 'unfamiliar' carbon source. *BMC Genomics*. 2016;17:674. doi: 10.1186/s12864-016-3010-x.  
679 PubMed PMID: 27552923; PubMed Central PMCID: PMCPMC5477773.
- 680 3. Sheppard SK, Guttman DS, Fitzgerald JR. Population genomics of bacterial host adaptation.  
681 *Nat Rev Genet*. 2018;19(9):549-65. doi: 10.1038/s41576-018-0032-z. PubMed PMID: 29973680.
- 682 4. Peter J, Schacherer J. Population genomics of yeasts: towards a comprehensive view  
683 across a broad evolutionary scale. *Yeast*. 2016;33(3):73-81. doi: 10.1002/yea.3142. PubMed PMID:  
684 26592376.
- 685 5. Doebley JF, Gaut BS, Smith BD. The Molecular Genetics of Crop Domestication. *Cell*.  
686 2006;127(7):1309-21. doi: <https://doi.org/10.1016/j.cell.2006.12.006>.
- 687 6. Denham T, Barton H, Castillo C, Crowther A, Dotte-Sarout E, Florin SA, et al. The  
688 domestication syndrome in vegetatively propagated field crops. *Ann Bot*. 2020;125(4):581-97. doi:  
689 10.1093/aob/mcz212. PubMed PMID: 31903489; PubMed Central PMCID: PMCPMC7102979.
- 690 7. Iqbal MM, Erskine W, Berger JD, Nelson MN. Phenotypic characterisation and linkage  
691 mapping of domestication syndrome traits in yellow lupin (*Lupinus luteus* L.). *Theor Appl Genet*.  
692 2020;133(10):2975-87. doi: 10.1007/s00122-020-03650-9. PubMed PMID: 32683474; PubMed  
693 Central PMCID: PMCPMC7497344.
- 694 8. Gibbons JG, Salichos L, Slot JC, Rinker DC, McGary KL, King JG, et al. The evolutionary  
695 imprint of domestication on genome variation and function of the filamentous fungus *Aspergillus*  
696 *oryzae*. *Curr Biol*. 2012;22(15):1403-9. doi: 10.1016/j.cub.2012.05.033. PubMed PMID: 22795693;  
697 PubMed Central PMCID: PMCPMC3416971.
- 698 9. Bodinaku I, Shaffer J, Connors AB, Steenwyk JL, Biango-Daniels MN, Kastman EK, et al.  
699 Rapid Phenotypic and Metabolomic Domestication of Wild *Penicillium* Molds on Cheese. *mBio*.  
700 2019;10(5). doi: 10.1128/mBio.02445-19. PubMed PMID: 31615965; PubMed Central PMCID:  
701 PMCPMC6794487.

- 702 10. Duan S-F, Han P-J, Wang Q-M, Liu W-Q, Shi J-Y, Li K, et al. The origin and adaptive  
703 evolution of domesticated populations of yeast from Far East Asia. *Nature Communications*.  
704 2018;9(1):2690. doi: 10.1038/s41467-018-05106-7.
- 705 11. Goncalves M, Pontes A, Almeida P, Barbosa R, Serra M, Libkind D, et al. Distinct  
706 Domestication Trajectories in Top-Fermenting Beer Yeasts and Wine Yeasts. *Curr Biol*.  
707 2016;26(20):2750-61. doi: 10.1016/j.cub.2016.08.040. PubMed PMID: 27720622.
- 708 12. Gallone B, Mertens S, Gordon JL, Maere S, Verstrepen KJ, Steensels J. Origins, evolution,  
709 domestication and diversity of *Saccharomyces* beer yeasts. *Curr Opin Biotechnol*. 2018;49:148-55.  
710 doi: 10.1016/j.copbio.2017.08.005. PubMed PMID: 28869826.
- 711 13. Lang GI, Parsons L, Gammie AE. Mutation rates, spectra, and genome-wide distribution of  
712 spontaneous mutations in mismatch repair deficient yeast. *G3 (Bethesda)*. 2013;3(9):1453-65. doi:  
713 10.1534/g3.113.006429. PubMed PMID: 23821616; PubMed Central PMCID: PMC3755907.
- 714 14. Gallone B, Steensels J, Mertens S, Dzialo MC, Gordon JL, Wauters R, et al. Interspecific  
715 hybridization facilitates niche adaptation in beer yeast. *Nat Ecol Evol*. 2019;3(11):1562-75. doi:  
716 10.1038/s41559-019-0997-9. PubMed PMID: 31636425.
- 717 15. Langdon QK, Peris D, Baker EP, Opulente DA, Nguyen HV, Bond U, et al. Fermentation  
718 innovation through complex hybridization of wild and domesticated yeasts. *Nat Ecol Evol*.  
719 2019;3(11):1576-86. doi: 10.1038/s41559-019-0998-8. PubMed PMID: 31636426; PubMed Central  
720 PMCID: PMC7295394.
- 721 16. Gallone B, Steensels J, Prah T, Soriaga L, Saels V, Herrera-Malaver B, et al. Domestication  
722 and Divergence of *Saccharomyces cerevisiae* Beer Yeasts. *Cell*. 2016;166(6):1397-410 e16. doi:  
723 10.1016/j.cell.2016.08.020. PubMed PMID: 27610566; PubMed Central PMCID: PMC5018251.
- 724 17. Bokulich NA, Bamforth CW. The microbiology of malting and brewing. *Microbiol Mol Biol*  
725 *Rev*. 2013;77(2):157-72. doi: 10.1128/MMBR.00060-12. PubMed PMID: 23699253; PubMed  
726 Central PMCID: PMC3668669.
- 727 18. Libkind D, Hittinger CT, Valerio E, Goncalves C, Dover J, Johnston M, et al. Microbe  
728 domestication and the identification of the wild genetic stock of lager-brewing yeast. *Proc Natl*  
729 *Acad Sci U S A*. 2011;108(35):14539-44. doi: 10.1073/pnas.1105430108. PubMed PMID: 21873232;  
730 PubMed Central PMCID: PMC3167505.
- 731 19. Salazar AN, Gorter de Vries AR, van den Broek M, Brouwers N, de la Torre Cortes P,  
732 Kuijpers NGA, et al. Chromosome level assembly and comparative genome analysis confirm lager-  
733 brewing yeasts originated from a single hybridization. *BMC Genomics*. 2019;20(1):916. doi:  
734 10.1186/s12864-019-6263-3. PubMed PMID: 31791228; PubMed Central PMCID:  
735 PMC6889557.
- 736 20. Gibson B, Geertman JA, Hittinger CT, Krogerus K, Libkind D, Louis EJ, et al. New yeasts-new  
737 brews: modern approaches to brewing yeast design and development. *FEMS Yeast Res*.  
738 2017;17(4). doi: 10.1093/femsyr/fox038. PubMed PMID: 28582493.
- 739 21. Diderich JA, Weening SM, van den Broek M, Pronk JT, Daran JG. Selection of Pof(-  
740 )*Saccharomyces eubayanus* Variants for the Construction of *S. cerevisiae* x *S. eubayanus* Hybrids  
741 With Reduced 4-Vinyl Guaiacol Formation. *Front Microbiol*. 2018;9:1640. doi:  
742 10.3389/fmicb.2018.01640. PubMed PMID: 30100898; PubMed Central PMCID:  
743 PMC6074607.
- 744 22. van den Broek M, Bolat I, Nijkamp JF, Ramos E, Luttik MA, Koopman F, et al. Chromosomal  
745 Copy Number Variation in *Saccharomyces pastorianus* Is Evidence for Extensive Genome Dynamics  
746 in Industrial Lager Brewing Strains. *Appl Environ Microbiol*. 2015;81(18):6253-67. doi:  
747 10.1128/AEM.01263-15. PubMed PMID: 26150454; PubMed Central PMCID: PMC4542246.
- 748 23. Magalhaes F, Vidgren V, Ruohonen L, Gibson B. Maltose and maltotriose utilisation by  
749 group I strains of the hybrid lager yeast *Saccharomyces pastorianus*. *FEMS Yeast Res*. 2016;16(5).

- 750 doi: 10.1093/femsyr/fow053. PubMed PMID: 27364826; PubMed Central PMCID:  
751 PMCPMC5815069.
- 752 24. Brouwers N, Brickwedde A, Gorter de Vries AR, van den Broek M, Weening SM, van den  
753 Eijnden L, et al. Himalayan *Saccharomyces eubayanus* Genome Sequences Reveal Genetic Markers  
754 Explaining Heterotic Maltotriose Consumption by *Saccharomyces pastorianus* Hybrids. *Appl*  
755 *Environ Microbiol.* 2019;85(22). doi: 10.1128/AEM.01516-19. PubMed PMID: 31519660; PubMed  
756 Central PMCID: PMCPMC6821976.
- 757 25. Eizaguirre JI, Peris D, Rodriguez ME, Lopes CA, De Los Rios P, Hittinger CT, et al.  
758 Phylogeography of the wild Lager-brewing ancestor (*Saccharomyces eubayanus*) in Patagonia.  
759 *Environ Microbiol.* 2018. doi: 10.1111/1462-2920.14375. PubMed PMID: 30105823.
- 760 26. Langdon QK, Peris D, Eizaguirre JI, Oplente DA, Buh KV, Sylvester K, et al. Postglacial  
761 migration shaped the genomic diversity and global distribution of the wild ancestor of lager-  
762 brewing hybrids. *PLoS Genet.* 2020;16(4):e1008680. doi: 10.1371/journal.pgen.1008680. PubMed  
763 PMID: 32251477.
- 764 27. Nespolo RF, Villarroel CA, Oporto CI, Tapia SM, Vega-Macaya F, Urbina K, et al. An Out-of-  
765 Patagonia migration explains the worldwide diversity and distribution of *Saccharomyces*  
766 *eubayanus* lineages. *PLoS Genet.* 2020;16(5):e1008777. doi: 10.1371/journal.pgen.1008777.  
767 PubMed PMID: 32357148; PubMed Central PMCID: PMCPMC7219788.
- 768 28. Urbina K, Villarreal P, Nespolo RF, Salazar R, Santander R, Cubillos FA. Volatile Compound  
769 Screening Using HS-SPME-GC/MS on *Saccharomyces eubayanus* Strains under Low-Temperature  
770 Pilsner Wort Fermentation. *Microorganisms.* 2020;8(5). doi: 10.3390/microorganisms8050755.  
771 PubMed PMID: 32443420.
- 772 29. Mardones W, Villarroel CA, Krogerus K, Tapia SM, Urbina K, Oporto CI, et al. Molecular  
773 profiling of beer wort fermentation diversity across natural *Saccharomyces eubayanus* isolates.  
774 *Microb Biotechnol.* 2020. doi: 10.1111/1751-7915.13545. PubMed PMID: 32096913.
- 775 30. Krogerus K, Magalhaes F, Vidgren V, Gibson B. New lager yeast strains generated by  
776 interspecific hybridization. *J Ind Microbiol Biotechnol.* 2015;42(5):769-78. doi: 10.1007/s10295-  
777 015-1597-6. PubMed PMID: 25682107; PubMed Central PMCID: PMCPMC4412690.
- 778 31. Martinez C, Cosgaya P, Vasquez C, Gac S, Ganga A. High degree of correlation between  
779 molecular polymorphism and geographic origin of wine yeast strains. *J Appl Microbiol.*  
780 2007;103(6):2185-95. doi: 10.1111/j.1365-2672.2007.03493.x. PubMed PMID: 18045401.
- 781 32. Tesniere C, Delobel P, Pradal M, Blondin B. Impact of nutrient imbalance on wine alcoholic  
782 fermentations: nitrogen excess enhances yeast cell death in lipid-limited must. *PLoS One.*  
783 2013;8(4):e61645. doi: 10.1371/journal.pone.0061645. PubMed PMID: 23658613; PubMed  
784 Central PMCID: PMCPMC3637302.
- 785 33. Hall BG, Acar H, Nandipati A, Barlow M. Growth rates made easy. *Mol Biol Evol.*  
786 2014;31(1):232-8. doi: 10.1093/molbev/mst187. PubMed PMID: 24170494.
- 787 34. Perez-Samper G, Cerulus B, Jariani A, Vermeersch L, Barrajon Simancas N, Bisschops  
788 MMM, et al. The Crabtree Effect Shapes the *Saccharomyces cerevisiae* Lag Phase during the Switch  
789 between Different Carbon Sources. *mBio.* 2018;9(5). doi: 10.1128/mBio.01331-18. PubMed PMID:  
790 30377274; PubMed Central PMCID: PMCPMC6212832.
- 791 35. Chen S, Zhou Y, Chen Y, Gu J. fastp: an ultra-fast all-in-one FASTQ preprocessor.  
792 *Bioinformatics.* 2018;34(17):i884-i90. Epub 2018/11/14. doi: 10.1093/bioinformatics/bty560.  
793 PubMed PMID: 30423086; PubMed Central PMCID: PMCPMC6129281.
- 794 36. Brickwedde A, Brouwers N, van den Broek M, Gallego Murillo JS, Fraiture JL, Pronk JT, et al.  
795 Structural, Physiological and Regulatory Analysis of Maltose Transporter Genes in *Saccharomyces*  
796 *eubayanus* CBS 12357(T). *Front Microbiol.* 2018;9:1786. doi: 10.3389/fmicb.2018.01786. PubMed  
797 PMID: 30147677; PubMed Central PMCID: PMCPMC6097016.

- 798 37. Li H, Durbin R. Fast and accurate short read alignment with Burrows-Wheeler transform.  
799 *Bioinformatics*. 2009;25(14):1754-60. Epub 2009/05/20. doi: btp324 [pii]  
800 10.1093/bioinformatics/btp324. PubMed PMID: 19451168; PubMed Central PMCID: PMC2705234.
- 801 38. Li H. A statistical framework for SNP calling, mutation discovery, association mapping and  
802 population genetical parameter estimation from sequencing data. *Bioinformatics*.  
803 2011;27(21):2987-93. doi: 10.1093/bioinformatics/btr509. PubMed PMID: 21903627; PubMed  
804 Central PMCID: PMC3198575.
- 805 39. McKenna A, Hanna M, Banks E, Sivachenko A, Cibulskis K, Kernytzky A, et al. The Genome  
806 Analysis Toolkit: a MapReduce framework for analyzing next-generation DNA sequencing data.  
807 *Genome Res*. 2010;20(9):1297-303. doi: 10.1101/gr.107524.110. PubMed PMID: 20644199;  
808 PubMed Central PMCID: PMC32928508.
- 809 40. Garrison E, Marth G. Haplotype-based variant detection from short-read sequencing.  
810 *arXiv*. 2012;1207.
- 811 41. Cingolani P, Platts A, Wang le L, Coon M, Nguyen T, Wang L, et al. A program for  
812 annotating and predicting the effects of single nucleotide polymorphisms, SnpEff: SNPs in the  
813 genome of *Drosophila melanogaster* strain w1118; iso-2; iso-3. *Fly*. 2012;6(2):80-92. Epub  
814 2012/06/26. doi: 10.4161/fly.19695. PubMed PMID: 22728672; PubMed Central PMCID:  
815 PMC3679285.
- 816 42. Ueno Y, Arita M, Kumagai T, Asai K. Processing sequence annotation data using the Lua  
817 programming language. *Genome Inform*. 2003;14:154-63. PubMed PMID: 15706530.
- 818 43. Yue JX, Liti G. Long-read sequencing data analysis for yeasts. *Nat Protoc*. 2018;13(6):1213-  
819 31. Epub 2018/05/05. doi: 10.1038/nprot.2018.025. PubMed PMID: 29725120.
- 820 44. Stanke M, Morgenstern B. AUGUSTUS: a web server for gene prediction in eukaryotes that  
821 allows user-defined constraints. *Nucleic Acids Res*. 2005;33(Web Server issue):W465-7. doi:  
822 10.1093/nar/gki458. PubMed PMID: 15980513; PubMed Central PMCID: PMC31160219.
- 823 45. Grabherr MG, Haas BJ, Yassour M, Levin JZ, Thompson DA, Amit I, et al. Full-length  
824 transcriptome assembly from RNA-Seq data without a reference genome. *Nat Biotechnol*.  
825 2011;29(7):644-52. doi: 10.1038/nbt.1883. PubMed PMID: 21572440.
- 826 46. Simao FA, Waterhouse RM, Ioannidis P, Kriventseva EV, Zdobnov EM. BUSCO: assessing  
827 genome assembly and annotation completeness with single-copy orthologs. *Bioinformatics*.  
828 2015;31(19):3210-2. doi: 10.1093/bioinformatics/btv351. PubMed PMID: 26059717.
- 829 47. O'Donnell S, Fischer G. MUM&Co: accurate detection of all SV types through whole-  
830 genome alignment. *Bioinformatics*. 2020;36(10):3242-3. doi: 10.1093/bioinformatics/btaa115.  
831 PubMed PMID: 32096823.
- 832 48. Zhou Y, Zhou B, Pache L, Chang M, Khodabakhshi AH, Tanaseichuk O, et al. Metascape  
833 provides a biologist-oriented resource for the analysis of systems-level datasets. *Nature*  
834 *Communications*. 2019;10(1):1523. doi: 10.1038/s41467-019-09234-6.
- 835 49. Gearing LJ, Cumming HE, Chapman R, Finkel AM, Woodhouse IB, Luu K, et al. CiiiDER: A  
836 tool for predicting and analysing transcription factor binding sites. *PLoS One*.  
837 2019;14(9):e0215495. doi: 10.1371/journal.pone.0215495. PubMed PMID: 31483836; PubMed  
838 Central PMCID: PMC6726224.
- 839 50. Dobin A, Davis CA, Schlesinger F, Drenkow J, Zaleski C, Jha S, et al. STAR: ultrafast universal  
840 RNA-seq aligner. *Bioinformatics*. 2013;29(1):15-21. doi: 10.1093/bioinformatics/bts635. PubMed  
841 PMID: 23104886; PubMed Central PMCID: PMC3530905.
- 842 51. Liao Y, Smyth GK, Shi W. featureCounts: an efficient general purpose program for assigning  
843 sequence reads to genomic features. *Bioinformatics*. 2014;30(7):923-30. doi:  
844 10.1093/bioinformatics/btt656. PubMed PMID: 24227677.

- 845 52. Love MI, Huber W, Anders S. Moderated estimation of fold change and dispersion for RNA-  
846 seq data with DESeq2. *Genome Biology*. 2014;15(12):550. doi: 10.1186/s13059-014-0550-8.
- 847 53. Shannon P, Markiel A, Ozier O, Baliga NS, Wang JT, Ramage D, et al. Cytoscape: a software  
848 environment for integrated models of biomolecular interaction networks. *Genome Res*.  
849 2003;13(11):2498-504. doi: 10.1101/gr.1239303. PubMed PMID: 14597658; PubMed Central  
850 PMCID: PMCPMC403769.
- 851 54. Krysan DJ, Ting EL, Abeijon C, Kroos L, Fuller RS. Yapsins are a family of aspartyl proteases  
852 required for cell wall integrity in *Saccharomyces cerevisiae*. *Eukaryotic cell*. 2005;4(8):1364-74. doi:  
853 10.1128/EC.4.8.1364-1374.2005. PubMed PMID: 16087741.
- 854 55. Teste MA, Francois JM, Parrou JL. Characterization of a new multigene family encoding  
855 isomaltases in the yeast *Saccharomyces cerevisiae*, the IMA family. *J Biol Chem*.  
856 2010;285(35):26815-24. doi: 10.1074/jbc.M110.145946. PubMed PMID: 20562106; PubMed  
857 Central PMCID: PMCPMC2930680.
- 858 56. Murphy JP, Stepanova E, Everley RA, Paulo JA, Gygi SP. Comprehensive Temporal Protein  
859 Dynamics during the Diauxic Shift in *Saccharomyces cerevisiae*. *Mol Cell Proteomics*.  
860 2015;14(9):2454-65. doi: 10.1074/mcp.M114.045849. PubMed PMID: 26077900; PubMed Central  
861 PMCID: PMCPMC4563728.
- 862 57. Long D, Wilkinson KL, Taylor DK, Jiranek V. Novel Wine Yeast for Improved Utilisation of  
863 Proline during Fermentation. *Fermentation*. 2018;4(1):10. PubMed PMID:  
864 doi:10.3390/fermentation4010010.
- 865 58. Wang Z, Qi Q, Lin Y, Guo Y, Liu Y, Wang Q. QTL analysis reveals genomic variants linked to  
866 high-temperature fermentation performance in the industrial yeast. *Biotechnology for Biofuels*.  
867 2019;12(1):59. doi: 10.1186/s13068-019-1398-7.
- 868 59. Ramakrishnan V, Theodoris G, Bisson LF. Loss of IRA2 suppresses the growth defect on low  
869 glucose caused by the *snf3* mutation in *Saccharomyces cerevisiae*. *FEMS Yeast Research*.  
870 2007;7(1):67-77. doi: 10.1111/j.1567-1364.2006.00159.x.
- 871 60. Zampar GG, Kümmel A, Ewald J, Jol S, Niebel B, Picotti P, et al. Temporal system-level  
872 organization of the switch from glycolytic to gluconeogenic operation in yeast. *Mol Syst Biol*.  
873 2013;9:651. Epub 2013/04/04. doi: 10.1038/msb.2013.11. PubMed PMID: 23549479; PubMed  
874 Central PMCID: PMCPMC3693829.
- 875 61. Vázquez-García I, Salinas F, Li J, Fischer A, Barré B, Hallin J, et al. Clonal Heterogeneity  
876 Influences the Fate of New Adaptive Mutations. *Cell Rep*. 2017;21(3):732-44. Epub 2017/10/19.  
877 doi: 10.1016/j.celrep.2017.09.046. PubMed PMID: 29045840; PubMed Central PMCID:  
878 PMCPMC5656752.
- 879 62. Hoekstra HE, Hoekstra JM, Berrigan D, Vignieri SN, Hoang A, Hill CE, et al. Strength and  
880 tempo of directional selection in the wild. *Proc Natl Acad Sci U S A*. 2001;98(16):9157-60. doi:  
881 10.1073/pnas.161281098. PubMed PMID: 11470913; PubMed Central PMCID: PMCPMC55389.
- 882 63. Elena SF, Cooper VS, Lenski RE. Punctuated evolution caused by selection of rare beneficial  
883 mutations. *Science*. 1996;272(5269):1802-4. doi: 10.1126/science.272.5269.1802. PubMed PMID:  
884 8650581.
- 885 64. Dragosits M, Mozhayskiy V, Quinones-Soto S, Park J, Tagkopoulos I. Evolutionary potential,  
886 cross-stress behavior and the genetic basis of acquired stress resistance in *Escherichia coli*. *Mol*  
887 *Syst Biol*. 2013;9:643. Epub 2013/02/07. doi: 10.1038/msb.2012.76. PubMed PMID: 23385483;  
888 PubMed Central PMCID: PMCPMC3588905.
- 889 65. Callahan BJ, Fukami T, Fisher DS. Rapid evolution of adaptive niche construction in  
890 experimental microbial populations. *Evolution*. 2014;68(11):3307-16. doi: 10.1111/evo.12512.  
891 PubMed PMID: 25138718.

- 892 66. Thompson JN. Rapid evolution as an ecological process. *Trends Ecol Evol.* 1998;13(8):329-  
893 32. doi: 10.1016/s0169-5347(98)01378-0. PubMed PMID: 21238328.
- 894 67. Hagman A, Sall T, Compagno C, Piskur J. Yeast "make-accumulate-consume" life strategy  
895 evolved as a multi-step process that predates the whole genome duplication. *PLoS One.*  
896 2013;8(7):e68734. doi: 10.1371/journal.pone.0068734. PubMed PMID: 23869229; PubMed  
897 Central PMCID: PMC3711898.
- 898 68. Nespolo RF, Solano-Iguaran JJ, Paleo-Lopez R, Quintero-Galvis JF, Cubillos FA, Bozinovic F.  
899 Performance, genomic rearrangements, and signatures of adaptive evolution: Lessons from  
900 fermentative yeasts. *Ecol Evol.* 2020;10(12):5240-50. doi: 10.1002/ece3.6208. PubMed PMID:  
901 32607147; PubMed Central PMCID: PMC37319171.
- 902 69. Van den Bergh B, Swings T, Fauvart M, Michiels J. Experimental Design, Population  
903 Dynamics, and Diversity in Microbial Experimental Evolution. *Microbiology and Molecular Biology*  
904 *Reviews.* 2018;82(3):e00008-18. doi: 10.1128/mmb.00008-18.
- 905 70. Gibson BR, Lawrence SJ, Leclaire JPR, Powell CD, Smart KA. Yeast responses to stresses  
906 associated with industrial brewery handling. *FEMS Microbiology Reviews.* 2007;31(5):535-69. doi:  
907 10.1111/j.1574-6976.2007.00076.x.
- 908 71. Voordeckers K, Colding C, Grasso L, Pardo B, Hoes L, Kominek J, et al. Ethanol exposure  
909 increases mutation rate through error-prone polymerases. *Nat Commun.* 2020;11(1):3664. doi:  
910 10.1038/s41467-020-17447-3. PubMed PMID: 32694532; PubMed Central PMCID:  
911 PMC37374746.
- 912 72. Davis AP, Symington LS. The yeast recombinational repair protein Rad59 interacts with  
913 Rad52 and stimulates single-strand annealing. *Genetics.* 2001;159(2):515-25. PubMed PMID:  
914 11606529.
- 915 73. Mohandesi N, Siadat S, Haghbeen K, Hesampour A. Cloning and expression of  
916 *Saccharomyces cerevisiae* SUC2 gene in yeast platform and characterization of recombinant  
917 enzyme biochemical properties. *3 Biotech.* 2016;6. doi: 10.1007/s13205-016-0441-7.
- 918 74. Outten CE, Albetel AN. Iron sensing and regulation in *Saccharomyces cerevisiae*: Ironing  
919 out the mechanistic details. *Curr Opin Microbiol.* 2013;16(6):662-8. Epub 2013/08/22. doi:  
920 10.1016/j.mib.2013.07.020. PubMed PMID: 23962819; PubMed Central PMCID:  
921 PMC3842356.
- 922 75. Oomuro M, Watanabe D, Sugimoto Y, Kato T, Motoyama Y, Watanabe T, et al.  
923 Accumulation of intracellular S-adenosylmethionine increases the fermentation rate of bottom-  
924 fermenting brewer's yeast during high-gravity brewing. *J Biosci Bioeng.* 2018;126(6):736-41. Epub  
925 2018/06/21. doi: 10.1016/j.jbiosc.2018.05.027. PubMed PMID: 29921531.

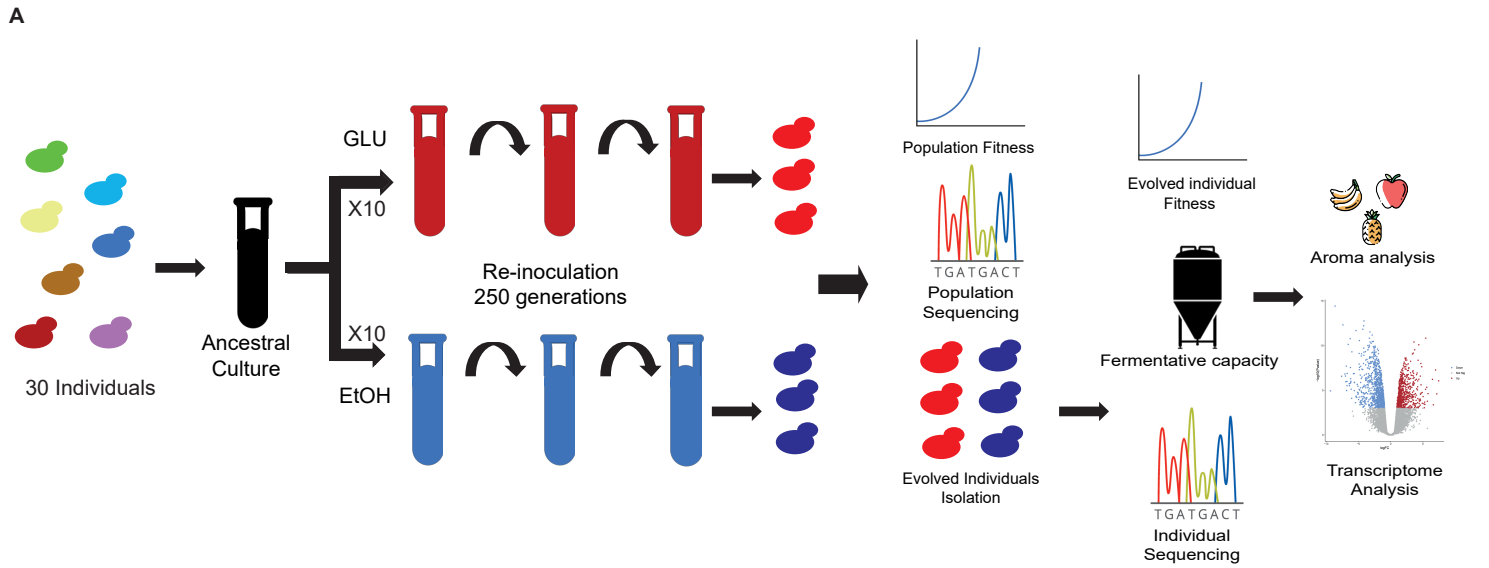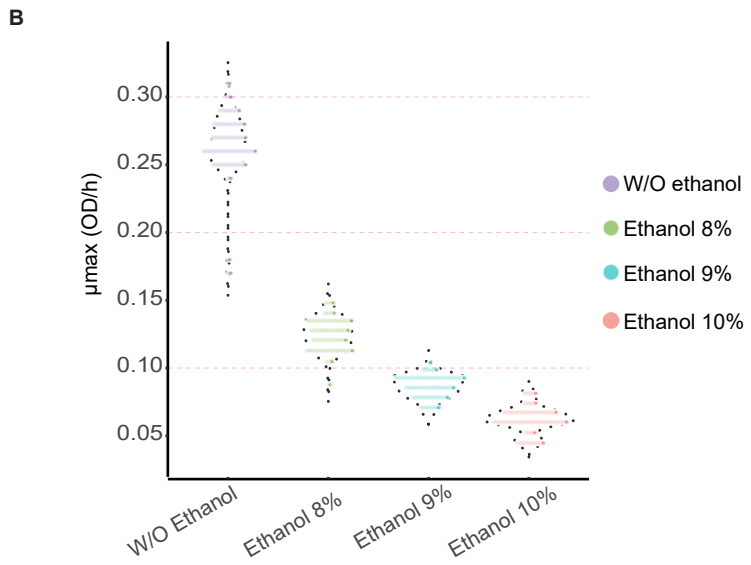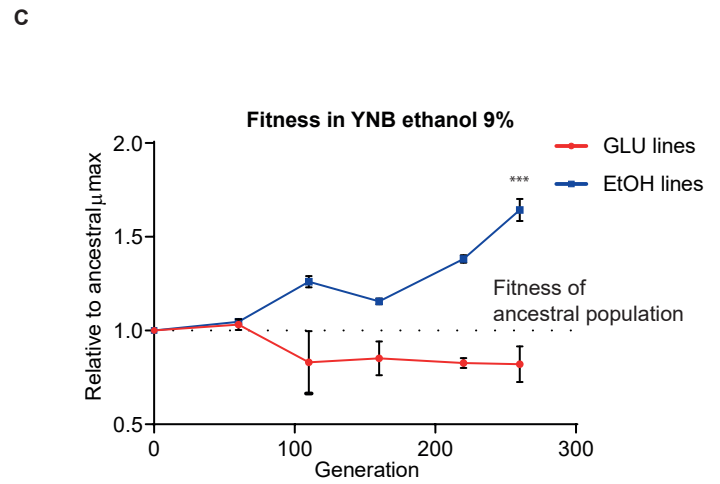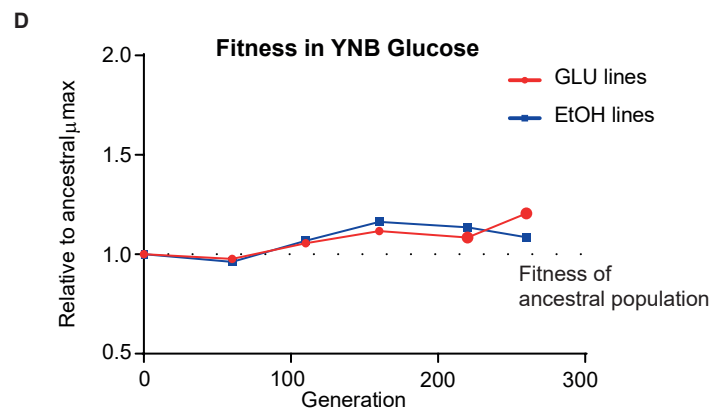



A

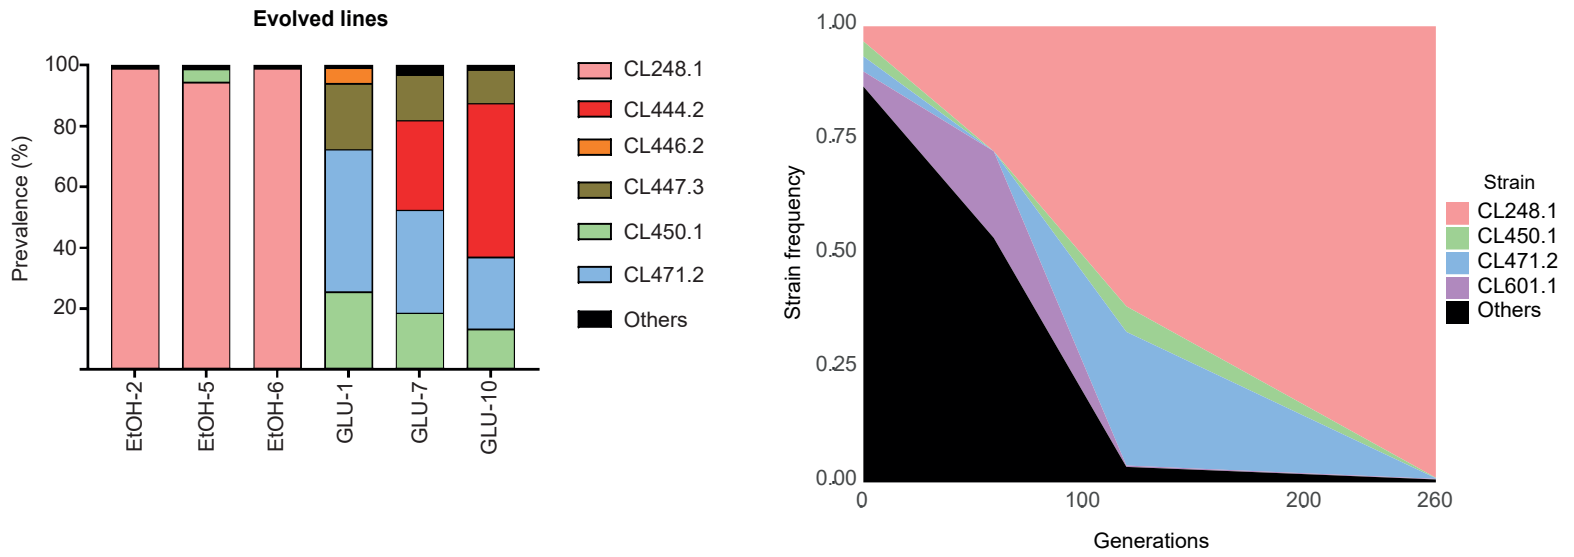

C

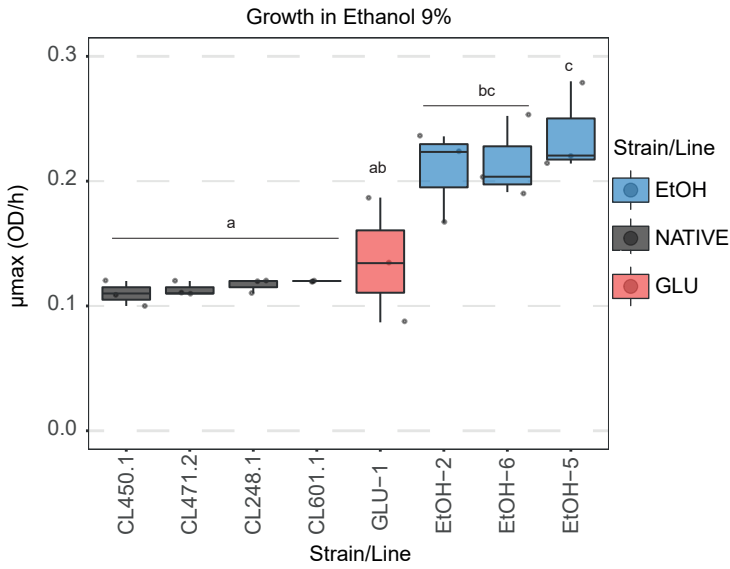

D

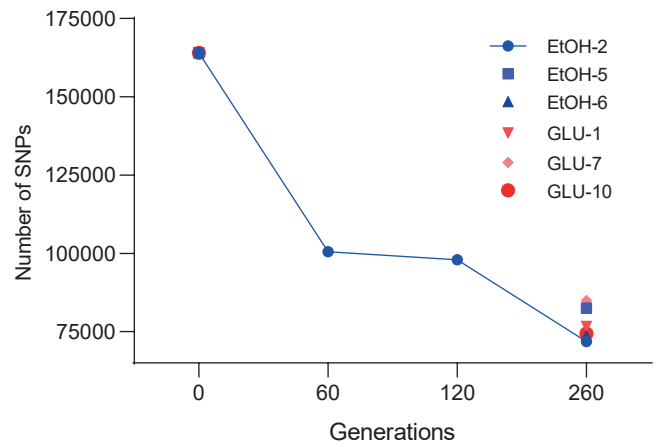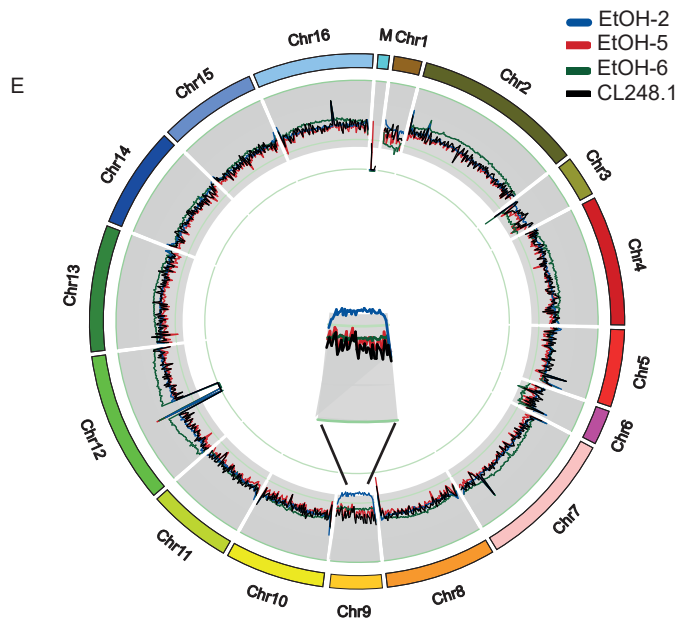

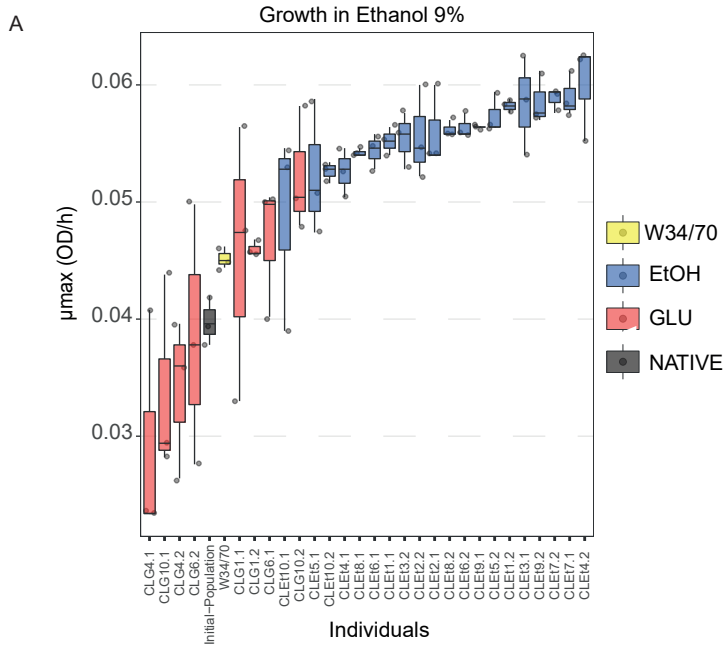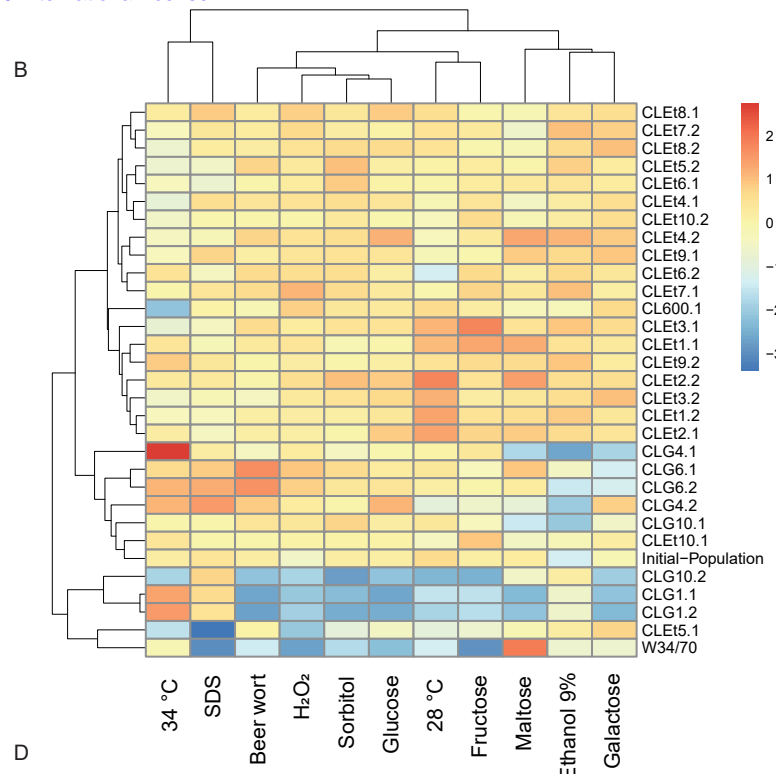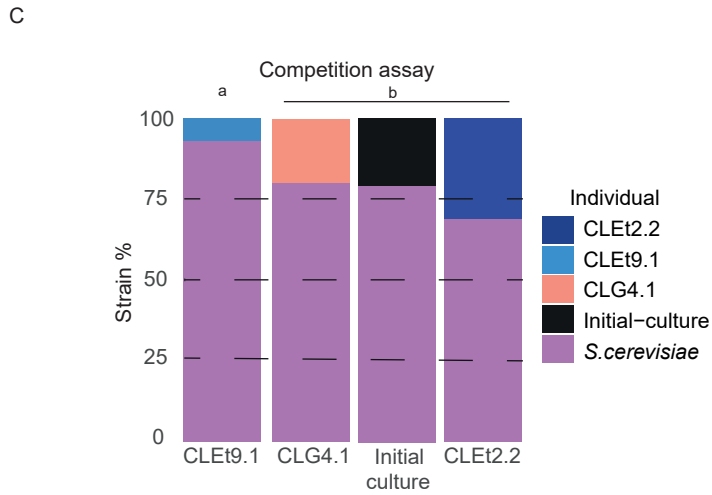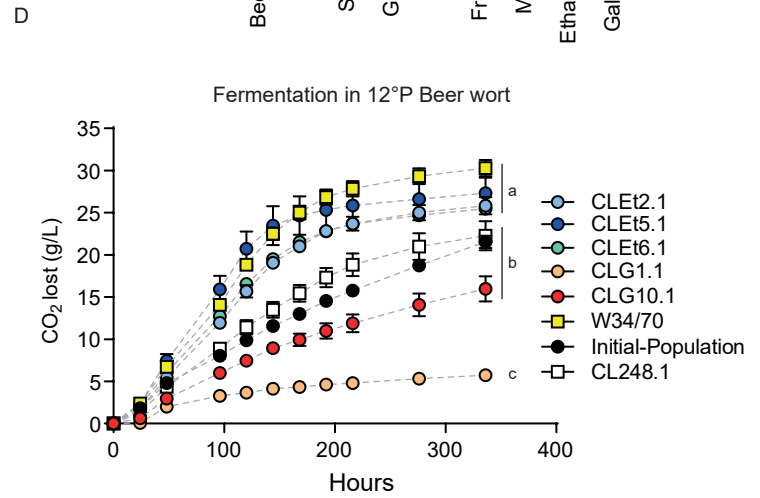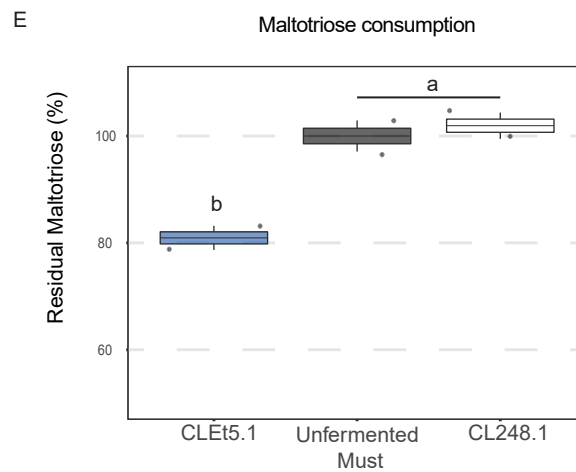

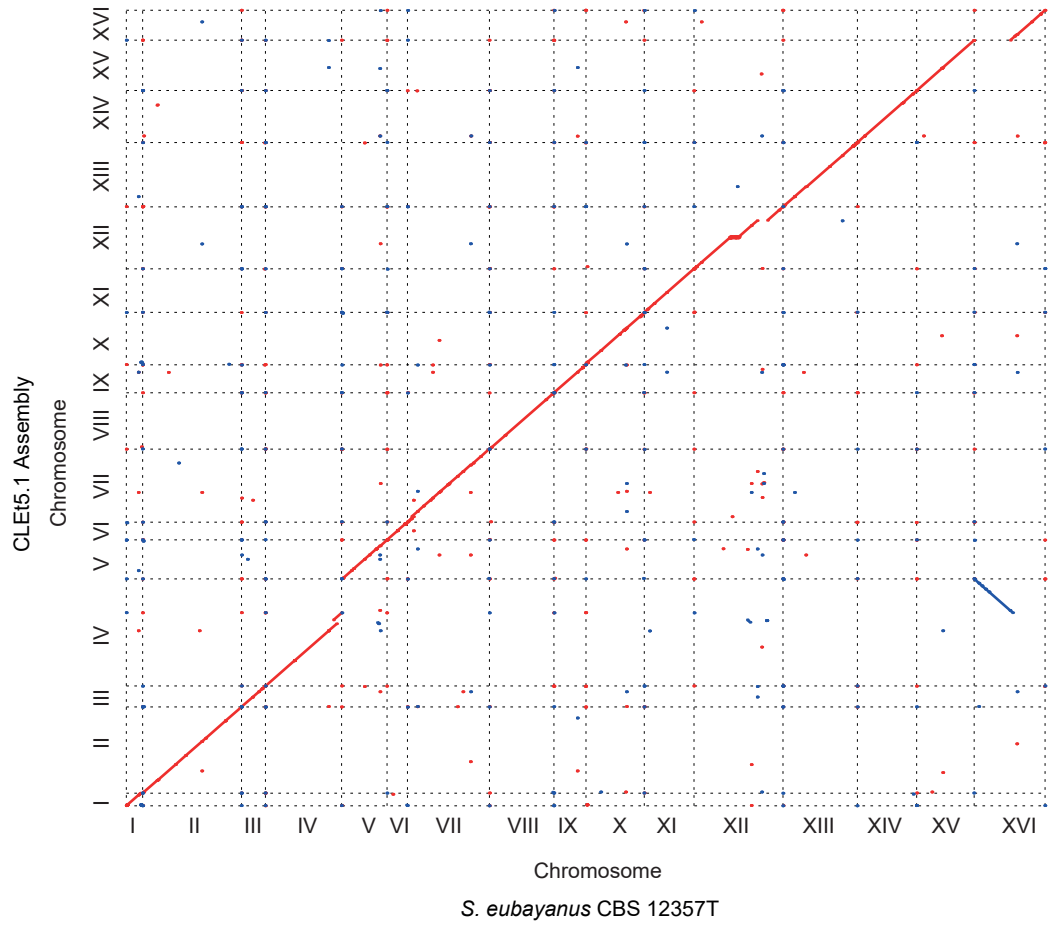

Figure 4.

A

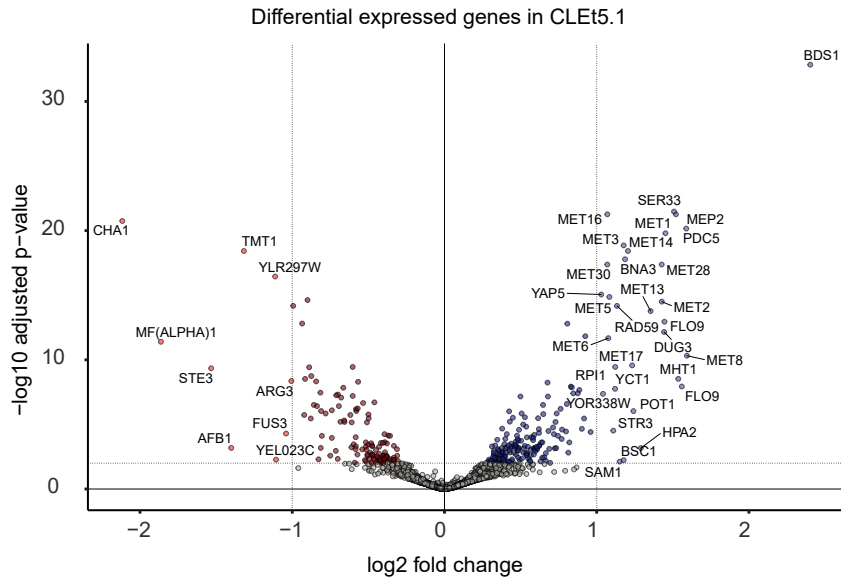

B

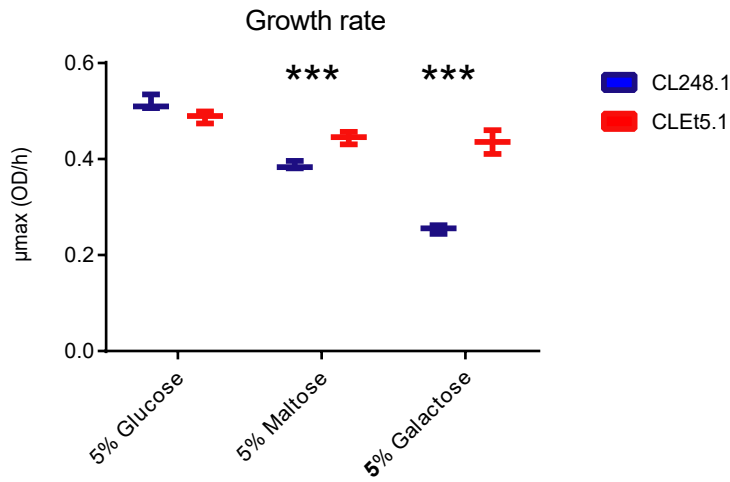

C

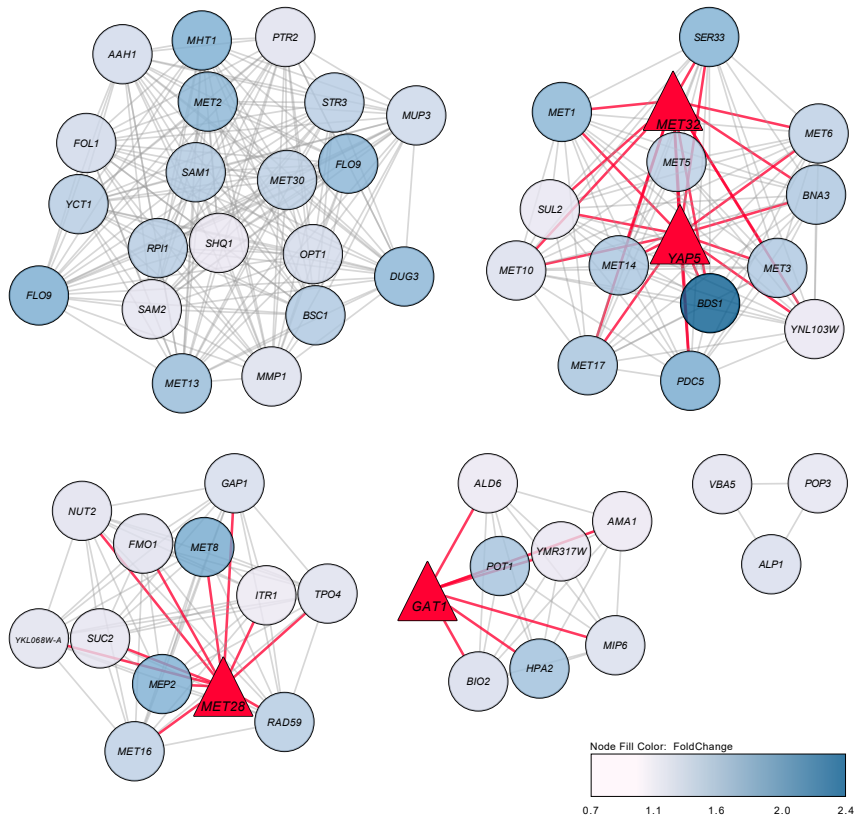

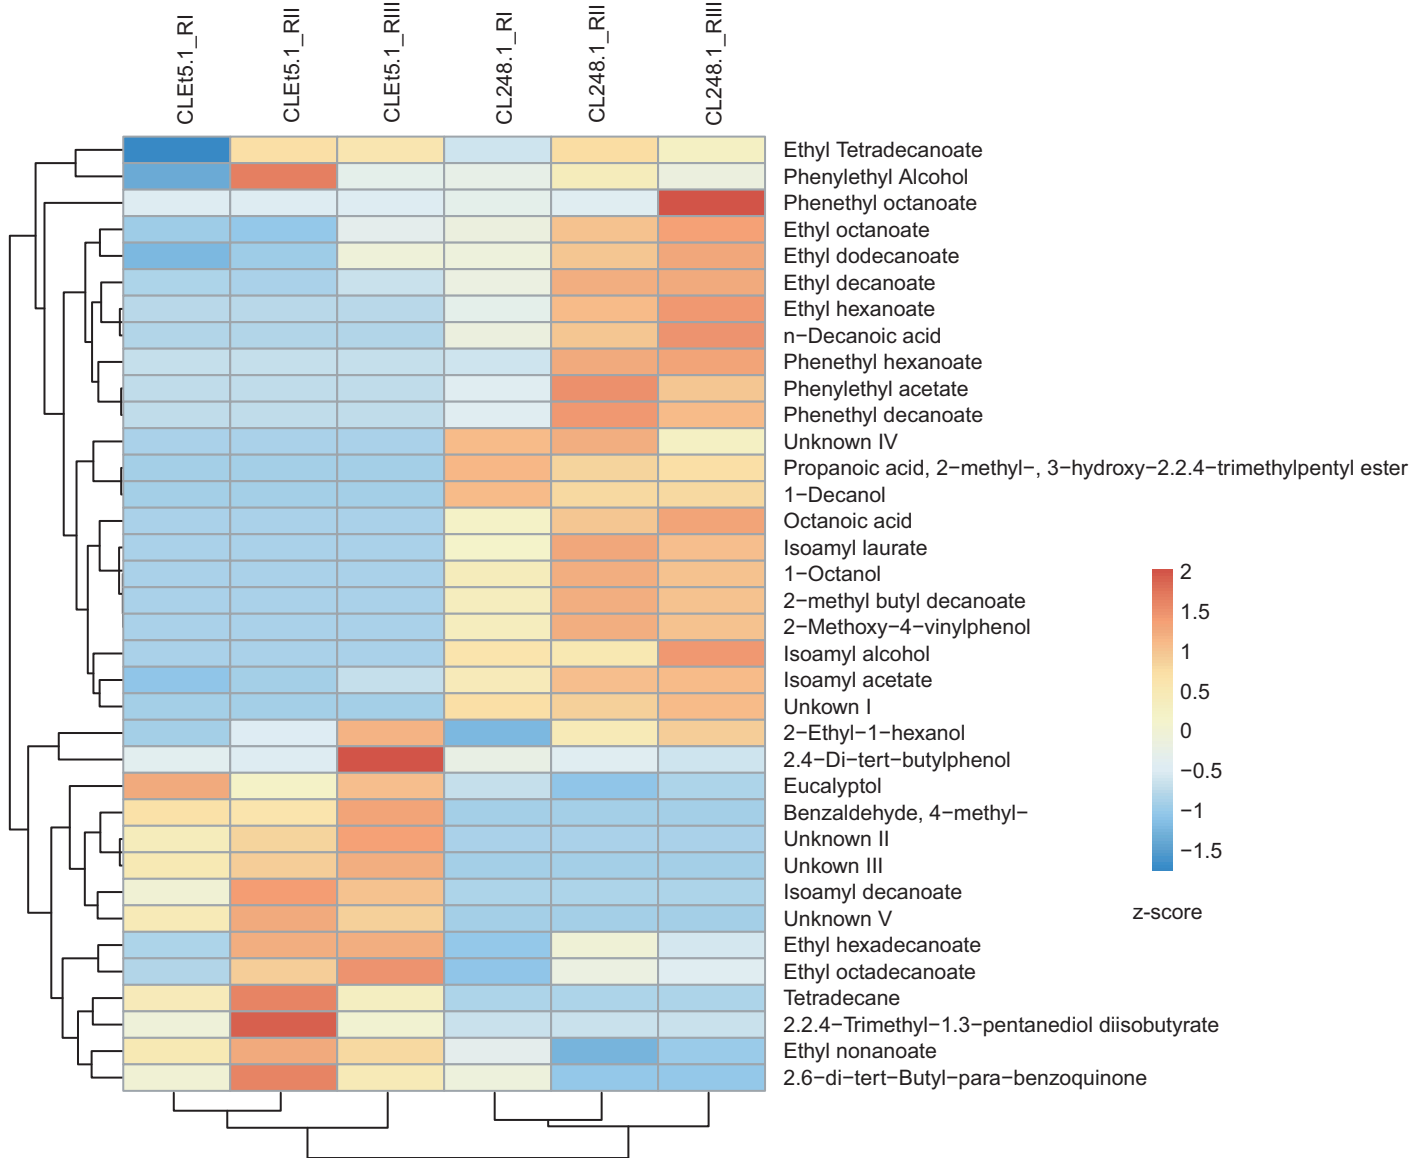

Figure 6
